# Supplementary material for: Uptake and Acceptability of Oral HIV Self-Testing among Community Pharmacy Clients in Kenya: A Feasibility Study
Source: PLoS One. 2017 Jan 26;12(1):e0170868. doi: 10.1371/journal.pone.0170868 (PMC5268447; doi:10.1371/journal.pone.0170868)
Supplement: S1 Dataset — (CSV) [file pone.0170868.s001.csv]

logged	screened	preqnr	buykit2	ifnobuy2	postqnr	logagecat	logsex	lit	pdtsort	pdtcat	pdtcat2	specpdt	pdtfor2	pdtfor	specpdtfor	prevhst	prevhstdesc	heardostb4	heardostb4desc	othertst	othertstdesc	partb4	prevtimes	prevtstdurcat2	motiv	prevtstwhere	rsnwhere	pharmno	tod	staffgender	period2	scrby2cat	deliver2	withpart	ifnopostqnr	racomment2	hstres	discl	towho	howeasy	care	rv_hst4pub	hst4pubexpl	rv_hst4pub2	rv_pharmhst	rv_pharmhst2	pharmhstexpl2	whoneedscat	whoneeds2cat
1	1	1	1		0	25-35 years	Female	both swa and eng	hivtst	HST	HIV testing	kp	Self	Self		No		No	friend/ family member who heard about/participated in the study	Yes	pregnancy	No	2	earlier than 12 months ago	Advice from doctor or health provider/ ANC invitation	Government hospital/ clinic	I didnt choose myself, I had gone for other services	4	Afternoon	Male staff	Before posters	ra	Over the counter		did not test	RA2: client did not test - said kit was taken by neighbor. client did not make time to complete the questionnaire after several calls						Strongly agree	BUT AM 50/50 BECAUSE IT CAN BREAK UP RELATIONSHIPS		Strongly agree			Sex workers
1	1	0	0	no money		25-35 years	Female	both swa and eng	oc	Other products	Other products		Self	Self					friend/ family member who heard about/participated in the study									4	Afternoon	Male staff	Before posters	ra
1	0	0	0	in a hurry/ to come later		18-24 years	Female		epill	Other products	Other products		Self	Self					friend/ family member who heard about/participated in the study									4	Afternoon	Female staff	Before posters
1	0	0	0	in a hurry/ to come later		>35 years	Male		perform	Other products	Other products		Self	Self					friend/ family member who heard about/participated in the study									4	Night	Male staff	Before posters
1	0	0	0	in a hurry/ to come later		25-35 years	Male		condoms	Other products	Other products		Self	Self					friend/ family member who heard about/participated in the study									4	Night	Male staff	Before posters
1	0	0	0	in a hurry/ to come later		>35 years	Male		perform	Other products	Other products		Self	Self					friend/ family member who heard about/participated in the study									4	Night	Male staff	Before posters
1	1	1	1		1	25-35 years	Male	both swa and eng	hivtst	Other HIV test	HIV testing		Self	Self		No		No	friend/ family member who heard about/participated in the study	No		Yes	3	earlier than 12 months ago	To understand illness or symptoms that I had	VCT/ HTC center	Easily accessible	4	Morning	Female staff	Before posters	ra	In-pharmacy test	Yes		RA2: reported that he started ART, but declined to say where or when he enrolled in care	Pos	Yes	Sex partner	Easy	Yes	Agree		Agree	Agree	Agree		Everyone	The youth
1	1	1	1		1	25-35 years	Female	both swa and eng	hivtst	Other HIV test	HIV testing		Self	Self		No		No	friend/ family member who heard about/participated in the study	No		Yes	3	within last 12 months	Possible exposure to HIV	VCT/ HTC center	Easily accessible	4	Morning	Female staff	Before posters	ra	In-pharmacy test	Yes		RA2: partner of 1018 who tested positive. referred to CPGH for PEP on day of testing.	Neg	Yes	Sex partner	Very easy		Agree		Strongly agree	Agree	Strongly agree		The youth	The youth
1	0	0	0	in a hurry/ to come later		18-24 years	Female		epill	Other products	Other products		Self	Self					friend/ family member who heard about/participated in the study									4	Evening	Male staff	Before posters
1	0	0	0	declined		25-35 years	Female		condoms	Other products	Other products		Self	Self					friend/ family member who heard about/participated in the study									4	Evening	Male staff	Before posters
1	0	0	0	in a hurry/ to come later		>35 years	Male		hivtst	Other HIV test	HIV testing		Self	Self					friend/ family member who heard about/participated in the study									4	Afternoon	Female staff	Before posters
1	0	0	0	in a hurry/ to come later		18-24 years	Female		pgtst	Other products	Other products		Self	Self					friend/ family member who heard about/participated in the study									4	Morning	Female staff	Before posters
1	0	0	0	declined		25-35 years	Female		pgtst	Other products	Other products		Self	Self					friend/ family member who heard about/participated in the study									4	Afternoon	Female staff	Before posters
1	0	0	0	in a hurry/ to come later		25-35 years	Female		sti	Other products	Other products		Self	Self					friend/ family member who heard about/participated in the study									4	Morning	Female staff	Before posters
1	0	0	0	in a hurry/ to come later		18-24 years	Male		condoms	Other products	Other products		Self	Self					friend/ family member who heard about/participated in the study									4	Night	Male staff	Before posters
1	1	1	1		1	18-24 years	Female	swa only	hivtst	HST	HIV testing	kp	Self	Self		No		No	friend/ family member who heard about/participated in the study	No		Yes	>=4	within last 12 months	Encouraged by sex partner	Government hospital/ clinic	Easily accessible	4	Afternoon	Male staff	Before posters	ra	In-pharmacy test	No		RA2: client wanted a preliminary test prior to testing with partner client not answering her phone thus making the follow up on confirmatory test difficult	Neg	No		Very easy		Strongly agree		Strongly agree	Strongly agree	Strongly agree	easily accesable	Everyone	Everyone
1	1	0	0	in a hurry/ to come later		18-24 years	Female	both swa and eng	oc	Other products	Other products		Self	Self					friend/ family member who heard about/participated in the study									4	Night	Male staff	Before posters	ra
1	1	1	1		1	>35 years	Male	both swa and eng	hivtst	Other HIV test	HIV testing		Self	Self		Yes	determine	No	friend/ family member who heard about/participated in the study	No		Yes	1	earlier than 12 months ago	To understand illness or symptoms that I had	Private hospital/ clinic (including NGO, CBO and faith-based facilities)	Easily accessible	4	Night	Male staff	Before posters	ra	In-pharmacy test	Yes			Neg	Yes	Sex partner	Very easy		Strongly agree		Strongly agree	Strongly agree	Strongly agree		Married couples	Married couples
1	1	1	1		1	25-35 years	Female	both swa and eng	hivtst	Other HIV test	HIV testing		Self	Self		Yes	determine	No	friend/ family member who heard about/participated in the study	Yes	pregnancy	Yes	>=4	within last 12 months	To plan the future/ getting married/ take charge over one's health	Private hospital/ clinic (including NGO, CBO and faith-based facilities)	Easily accessible	4	Night	Male staff	Before posters	ra	In-pharmacy test	Yes			Neg	Yes	Sex partner	Very easy		Strongly agree	SO THAT PEOPLE KNOW THEIR STATUS	Strongly agree	Strongly agree	Strongly agree		Everyone	Everyone
1	1	0	0	in a hurry/ to come later		>35 years	Male	both swa and eng	condoms	Other products	Other products		Self	Self					friend/ family member who heard about/participated in the study									1	Afternoon	Male staff	Before posters	ra
1	1	0	0	in a hurry/ to come later		18-24 years	Female	both swa and eng	epill	Other products	Other products		Self	Self					friend/ family member who heard about/participated in the study									1	Afternoon	Female staff	Before posters	ra
1	0	0	0	declined		25-35 years	Female		oc	Other products	Other products		Self	Self					friend/ family member who heard about/participated in the study									1	Afternoon	Female staff	Before posters
1	1	0	0	very sick		25-35 years	Male	both swa and eng	mal	Other products	Other products		Self	Self					friend/ family member who heard about/participated in the study									1	Afternoon	Female staff	Before posters	ra
1	1	1	1		1	18-24 years	Female	swa only	pgtst	Other products	Other products		Self	Self		No		No	friend/ family member who heard about/participated in the study	Yes	pregnancy	Yes	2	within last 12 months	Encouraged by sex partner	Government hospital/ clinic	Easily accessible	1	Afternoon	Female staff	Before posters	ra	Over the counter	No			Neg	Yes	Friend	Very easy		Agree		Agree	Agree	Agree		Adults	Married couples
1	1	1	1		1	18-24 years	Male	swa only	condoms	Other products	Other products		Self	Self		No		No	friend/ family member who heard about/participated in the study	No		No	>=4	within last 12 months	Possible exposure to HIV	Private hospital/ clinic (including NGO, CBO and faith-based facilities)	Presence of skilled staff/ quality services/ information/ support	1	Morning	Male staff	Before posters	ra	Over the counter	No			Neg	No		Very easy		Agree		Strongly agree	Agree	Strongly agree		Everyone	Everyone
1	1	1	1		0	25-35 years	Female	swa only	mal	Other products	Other products		Self	Self		No		No	friend/ family member who heard about/participated in the study	Yes	pregnancy	No	3	earlier than 12 months ago	Possible exposure to HIV	Government hospital/ clinic	Easily accessible	1	Morning	Male staff	Before posters	ra	Over the counter		unreachable on phone	RA2: phone switched off or out of range						Agree			Agree			Married couples
1	1	1	0	kits not available		25-35 years	Female	both swa and eng	oc	Other products	Other products		Self	Self		No		No	friend/ family member who heard about/participated in the study	No		No	>=4	within last 12 months	Encouraged by friend or family member	Private hospital/ clinic (including NGO, CBO and faith-based facilities)	Presence of skilled staff/ quality services/ information/ support	1	Morning	Male staff	Before posters	ra										Strongly agree	so that people can know their status		Agree			Everyone
1	0	0	0	in a hurry/ to come later		25-35 years	Female		mal	Other products	Other products		Self	Self					friend/ family member who heard about/participated in the study									1	Afternoon	Male staff	Before posters
1	0	0	0	in a hurry/ to come later		>35 years	Female		mal	Other products	Other products		Self	Self					friend/ family member who heard about/participated in the study									1	Afternoon	Male staff	Before posters
1	1	0	0	not ready		18-24 years	Female	both swa and eng	mal	Other products	Other products		Self	Self					friend/ family member who heard about/participated in the study									1	Afternoon	Male staff	Before posters	ra
1	1	0	0	very sick		18-24 years	Male	both swa and eng	mal	Other products	Other products		Self	Self					friend/ family member who heard about/participated in the study									1	Morning	Female staff	Before posters	ra
1	1	1	0	kits not available		25-35 years	Male	both swa and eng	hivtst	Other HIV test	HIV testing		Self	Self		No		No	friend/ family member who heard about/participated in the study	No		Yes	>=4	within last 12 months	Advice from doctor or health provider/ ANC invitation	Government hospital/ clinic	Easily accessible	1	Morning	Male staff	Before posters	ra										Agree			Agree			Everyone
1	1	1	1		1	25-35 years	Female	swa only	oc	Other products	Other products		Self	Self		No		No	friend/ family member who heard about/participated in the study	No		Yes	3	within last 12 months	Advice from doctor or health provider/ ANC invitation	Government hospital/ clinic	I didnt choose myself, I had gone for other services	1	Morning	Male staff	Before posters	ra	Over the counter				Neg	Yes	Sex partner	Easy		Agree		Strongly agree	Agree	Strongly agree		Adults	Everyone
1	1	1	0	kits not available		25-35 years	Male	swa only	condoms	Other products	Other products		Self	Self		No		No	friend/ family member who heard about/participated in the study	No		No	>=4	within last 12 months	Possible exposure to HIV	Government hospital/ clinic	Easily accessible	1	Afternoon	Female staff	Before posters	ra										Agree			Agree			The youth
1	1	1	1		1	>35 years	Female	swa only	mal	Other products	Other products		Self	Self		No		No	friend/ family member who heard about/participated in the study	No		No	3	within last 12 months	Possible exposure to HIV	VCT/ HTC center	Presence of skilled staff/ quality services/ information/ support	1	Afternoon	Female staff	Before posters	ra	Over the counter				Neg	Yes	Family member	Very easy		Agree		Strongly agree	Agree	Agree		Everyone	Other
1	1	0	0	in a hurry/ to come later		25-35 years	Male	both swa and eng	mal	Other products	Other products		Self	Self					friend/ family member who heard about/participated in the study									1	Afternoon	Male staff	Before posters	ra
1	1	1	1		1	18-24 years	Female	swa only	epill	Other products	Other products		Self	Self		Yes	determine	Yes	friend/ family member who heard about/participated in the study	Yes	malaria	No	>=4	within last 12 months	Possible exposure to HIV	Government hospital/ clinic	Presence of skilled staff/ quality services/ information/ support	1	Afternoon	Male staff	Before posters	ra	Over the counter	No			Neg	Yes	Family member	Very easy		Undecided	not sure how others will handle the results	Strongly agree	Agree	Strongly agree	it will be better because many people prefer phamacies than hospital	The youth	The youth
1	1	0	0	in a hurry/ to come later		18-24 years	Female	both swa and eng	pgtst	Other products	Other products		Self	Self					friend/ family member who heard about/participated in the study									1	Afternoon	Female staff	Before posters	ra
1	0	0	0	declined		25-35 years	Male		epill	Other products	Other products		Other	Partner					friend/ family member who heard about/participated in the study									1	Afternoon	Female staff	Before posters
1	1	0	0	in a hurry/ to come later		25-35 years	Male	both swa and eng	epill	Other products	Other products		Other	Partner					friend/ family member who heard about/participated in the study									1	Evening	Female staff	Before posters	ra
1	1	0	0	in a hurry/ to come later		>35 years	Male	both swa and eng	mal	Other products	Other products		Self	Self					friend/ family member who heard about/participated in the study									1	Afternoon	Female staff	Before posters	ra
1	0	0	0	declined		>35 years	Male		epill	Other products	Other products		Other	Partner					friend/ family member who heard about/participated in the study									1	Afternoon	Male staff	Before posters
1	1	0	0	very sick		18-24 years	Male	both swa and eng	mal	Other products	Other products		Self	Self					friend/ family member who heard about/participated in the study									1	Afternoon	Female staff	Before posters	ra
1	0	0	0	declined		25-35 years	Male		mal	Other products	Other products		Self	Self					friend/ family member who heard about/participated in the study									1	Afternoon	Female staff	Before posters
1	1	0	0	in a hurry/ to come later		18-24 years	Female	both swa and eng	mal	Other products	Other products		Self	Self					friend/ family member who heard about/participated in the study									1	Morning	Female staff	Before posters	ra
1	1	0	0	to talk to partner first		18-24 years	Male	both swa and eng	epill	Other products	Other products		Other	Partner					friend/ family member who heard about/participated in the study									1	Afternoon	Male staff	Before posters	ra
1	1	0	0	very sick		>35 years	Female	both swa and eng	mal	Other products	Other products		Self	Self					friend/ family member who heard about/participated in the study									1	Afternoon	Male staff	Before posters	ra
1	1	0	0	no money		25-35 years	Male	both swa and eng	condoms	Other products	Other products		Self	Self					friend/ family member who heard about/participated in the study									1	Afternoon	Male staff	Before posters	ra
1	1	0	0	no money		18-24 years	Female	both swa and eng	mal	Other products	Other products		Other	Family member					friend/ family member who heard about/participated in the study									1	Morning	Male staff	Before posters	ra
1	0	0	0	declined		>35 years	Male		perform	Other products	Other products		Other	Family member					friend/ family member who heard about/participated in the study									2	Afternoon	Female staff	Before posters
1	0	0	0	in a hurry/ to come later		>35 years	Male		perform	Other products	Other products		Self	Self					friend/ family member who heard about/participated in the study									2	Evening	Female staff	Before posters
1	1	1	1		1	25-35 years	Male	both swa and eng	hivtst	Other HIV test	HIV testing		Self	Self		No		No	friend/ family member who heard about/participated in the study	No		Yes	1	within last 12 months	To understand illness or symptoms that I had	Private hospital/ clinic (including NGO, CBO and faith-based facilities)	Presence of skilled staff/ quality services/ information/ support	2	Morning	Female staff	Before posters	ra	Over the counter	No			Neg	Yes	Sex partner	Easy		Strongly agree	it is convinient , no pain involved, reduced risks of accidentally infecting others	Strongly agree	Strongly agree	Agree	because it is more private and easily accessable	Sex workers	Married couples
1	0	0	0	in a hurry/ to come later		25-35 years	Male		mal	Other products	Other products		Self	Self					friend/ family member who heard about/participated in the study									2	Morning	Female staff	Before posters
1	0	0	0	in a hurry/ to come later		>35 years	Male		perform	Other products	Other products		Other	Other	sales				friend/ family member who heard about/participated in the study									2	Afternoon	Female staff	Before posters
1	0	0	0	in a hurry/ to come later		>35 years	Female		hivtst	Other HIV test	HIV testing		Self	Self					friend/ family member who heard about/participated in the study									2	Afternoon	Female staff	Before posters
1	0	0	0	declined		>35 years	Male		condoms	Other products	Other products		Self	Self					friend/ family member who heard about/participated in the study									2	Afternoon	Female staff	Before posters
1	1	1	0	kits not available		25-35 years	Male	both swa and eng	condoms	Other products	Other products		Self	Self		Yes	some blood test	No	friend/ family member who heard about/participated in the study	Yes	diabetes	Yes	>=4	within last 12 months	Employment/ travel/ donating blood	Private hospital/ clinic (including NGO, CBO and faith-based facilities)	I didnt choose myself, I had gone for other services	2	Morning	Female staff	Before posters	ra										Strongly agree	so that everyone can know his or her status		Agree			Other
1	0	0	0	in a hurry/ to come later		18-24 years	Male		hivtst	Other HIV test	HIV testing		Self	Self					friend/ family member who heard about/participated in the study									2	Afternoon	Female staff	Before posters
1	1	1	1		0	>35 years	Male	both swa and eng	hivtst	HST	HIV testing	hst	Self	Self		No		No	friend/ family member who heard about/participated in the study	Yes	diabetes	Yes	2	earlier than 12 months ago	Advice from doctor or health provider/ ANC invitation	Government hospital/ clinic	Presence of skilled staff/ quality services/ information/ support	2	Morning	Female staff	Before posters	ra	Over the counter		did not test	RA2: client paid for kit but left in the pharmacy. subsequent follow-up unsuccessful						Strongly agree	it is a must fro people to know their status		Agree			Everyone
1	0	0	0	in a hurry/ to come later		>35 years	Male		hivtst	Other HIV test	HIV testing		Self	Self					friend/ family member who heard about/participated in the study									2	Morning	Female staff	Before posters
1	0	0	0	in a hurry/ to come later		25-35 years	Female		condoms	Other products	Other products		Self	Self					friend/ family member who heard about/participated in the study									2	Afternoon	Female staff	Before posters
1	0	0	0	in a hurry/ to come later		25-35 years	Male		pgtst	Other products	Other products		Self	Self					friend/ family member who heard about/participated in the study									2	Afternoon	Female staff	Before posters
1	0	0	0	in a hurry/ to come later		25-35 years	Male		hivtst	Other HIV test	HIV testing		Self	Self					friend/ family member who heard about/participated in the study									2	Afternoon	Female staff	Before posters
1	0	0	0	in a hurry/ to come later		>35 years	Male		other	Other products	Other products	lubricants	Other	Partner					friend/ family member who heard about/participated in the study									2	Afternoon	Female staff	Before posters
1	0	0	0	declined		>35 years	Male		other	Other products	Other products	lubricants	Self	Self					friend/ family member who heard about/participated in the study									2	Evening	Female staff	Before posters
1	0	0	0	declined		>35 years	Male		perform	Other products	Other products		Self	Self					friend/ family member who heard about/participated in the study									2	Morning	Female staff	Before posters
1	0	0	0	declined		>35 years	Female		condoms	Other products	Other products		Self	Self					friend/ family member who heard about/participated in the study									2	Afternoon	Female staff	Before posters
1	0	0	0	in a hurry/ to come later		>35 years	Male		perform	Other products	Other products		Self	Self					friend/ family member who heard about/participated in the study									2	Morning	Female staff	Before posters
1	0	0	0	in a hurry/ to come later		25-35 years	Male		perform	Other products	Other products		Other	Partner					friend/ family member who heard about/participated in the study									2	Morning	Female staff	Before posters
1	0	0	0	in a hurry/ to come later		>35 years	Male		perform	Other products	Other products	lubricants	Other	Other	clients				friend/ family member who heard about/participated in the study									2	Morning	Female staff	Before posters
1	1	1	1		1	>35 years	Male	both swa and eng	hivtst	HST	HIV testing	hst	Self	Self		No		Yes	friend/ family member who heard about/participated in the study	No		No	2	within last 12 months	To plan the future/ getting married/ take charge over one's health	Private hospital/ clinic (including NGO, CBO and faith-based facilities)	Easily accessible	2	Afternoon	Female staff	Before posters	ra	In-pharmacy test	Yes		RA2: client was impressed and satisfied by the results and asked if he can refer friends for the same	Neg	Yes	Sex partner	Very easy		Strongly agree	it is not a bad idea nad also easy fro people to know their status	Strongly agree	Strongly agree	Strongly agree	convinient	Sex workers	Sex workers
1	1	0	0	not ready		25-35 years	Male	both swa and eng	mal	Other products	Other products		Self	Self					friend/ family member who heard about/participated in the study									1	Afternoon	Female staff	Before posters	ra
1	1	0	0	in a hurry/ to come later		18-24 years	Female	both swa and eng	pgtst	Other products	Other products		Self	Self					friend/ family member who heard about/participated in the study									1	Afternoon	Male staff	Before posters	ra
1	1	0	0	in a hurry/ to come later		25-35 years	Male	both swa and eng	mal	Other products	Other products		Self	Self					friend/ family member who heard about/participated in the study									1	Afternoon	Male staff	Before posters	ra
1	1	0	0	to talk to partner first		25-35 years	Female	both swa and eng	mal	Other products	Other products		Self	Self					friend/ family member who heard about/participated in the study									1	Afternoon	Female staff	Before posters	ra
1	1	0	0	in a hurry/ to come later		18-24 years	Female	both swa and eng	epill	Other products	Other products		Self	Self					friend/ family member who heard about/participated in the study									1	Afternoon	Female staff	Before posters	ra
1	1	0	0	not ready		18-24 years	Female	swa only	pgtst	Other products	Other products		Self	Self					friend/ family member who heard about/participated in the study									1	Afternoon	Male staff	Before posters	ra
1	1	1	1		1	18-24 years	Male	both swa and eng	mal	Other products	Other products		Self	Self		No		No	friend/ family member who heard about/participated in the study	No		Yes	>=4	within last 12 months	To plan the future/ getting married/ take charge over one's health	Government hospital/ clinic	Easily accessible	1	Afternoon	Male staff	Before posters	ra	Over the counter	No			Neg	Yes	Sex partner	Very easy		Strongly agree	due to confidentiality and its easily used	Strongly agree	Agree	Agree		Everyone	The youth
1	1	1	1		1	18-24 years	Female	both swa and eng	epill	Other products	Other products		Self	Self		No		No	friend/ family member who heard about/participated in the study	No		No	>=4	earlier than 12 months ago	Advice from doctor or health provider/ ANC invitation	Private hospital/ clinic (including NGO, CBO and faith-based facilities)	I didnt choose myself, I had gone for other services	1	Afternoon	Male staff	Before posters	ra	Over the counter	No			Neg	Yes	Friend	Very easy		Agree		Strongly agree	Agree	Agree	most people visit pharmacies	The youth	The youth
1	0	0	0	in a hurry/ to come later		25-35 years	Female		pgtst	Other products	Other products		Self	Self					friend/ family member who heard about/participated in the study									1	Afternoon	Female staff	Before posters
1	0	0	0	declined		25-35 years	Female		mal	Other products	Other products		Self	Self					friend/ family member who heard about/participated in the study									1	Afternoon	Male staff	Before posters
1	1	1	0	kits not available		25-35 years	Male	both swa and eng	condoms	Other products	Other products		Self	Self		No		No	friend/ family member who heard about/participated in the study	No		No	>=4	within last 12 months	Possible exposure to HIV	Private hospital/ clinic (including NGO, CBO and faith-based facilities)	Confidential/ private/ discreet	1	Afternoon	Male staff	Before posters	ra										Agree			Agree			Everyone
1	1	0	0	in a hurry/ to come later		18-24 years	Female	both swa and eng	epill	Other products	Other products		Other	Other	friend				friend/ family member who heard about/participated in the study									1	Afternoon	Female staff	Before posters	ra
1	1	1	1		1	25-35 years	Male	both swa and eng	epill	Other products	Other products		Other	Partner		No		No	friend/ family member who heard about/participated in the study	No		Yes	>=4	within last 12 months	Encouraged by sex partner	Private hospital/ clinic (including NGO, CBO and faith-based facilities)	Easily accessible	1	Morning	Male staff	Before posters	ra	Over the counter	No			Neg	Yes	Sex partner	Very easy		Strongly agree	since people will be able to protect themselves against contracting the HIV virus	Strongly agree	Strongly agree	Strongly agree	for those who cant go to the VCT's will be able to buy and test	The youth	The youth
1	0	0	0	in a hurry/ to come later		18-24 years	Female		pgtst	Other products	Other products		Self	Self					friend/ family member who heard about/participated in the study									1	Afternoon	Female staff	Before posters
1	0	0	0	in a hurry/ to come later		25-35 years	Female		oc	Other products	Other products		Self	Self					friend/ family member who heard about/participated in the study									1	Evening	Female staff	Before posters
1	0	0	0	in a hurry/ to come later		25-35 years	Male		condoms	Other products	Other products		Self	Self					friend/ family member who heard about/participated in the study									1	Morning	Female staff	Before posters
1	0	0	0	in a hurry/ to come later		25-35 years	Male		mal	Other products	Other products		Self	Self					friend/ family member who heard about/participated in the study									1	Morning	Female staff	Before posters
1	0	0	0	in a hurry/ to come later		>35 years	Male		mal	Other products	Other products		Self	Self					friend/ family member who heard about/participated in the study									1	Afternoon	Female staff	Before posters
1	0	0	0	in a hurry/ to come later		18-24 years	Male		mal	Other products	Other products		Self	Self					friend/ family member who heard about/participated in the study									1	Afternoon	Female staff	Before posters
1	0	0	0	in a hurry/ to come later		18-24 years	Male		condoms	Other products	Other products		Self	Self					friend/ family member who heard about/participated in the study									1	Afternoon	Female staff	Before posters
1	0	0	0	declined		>35 years	Female		pgtst	Other products	Other products		Self	Self					friend/ family member who heard about/participated in the study									1	Morning	Male staff	Before posters
1	1	1	0	kits not available		25-35 years	Female	both swa and eng	pgtst	Other products	Other products		Self	Self		No		No	friend/ family member who heard about/participated in the study	Yes	pregnancy	No	>=4	within last 12 months	Encouraged by friend or family member	Government hospital/ clinic	Easily accessible	1	Afternoon	Male staff	Before posters	ra										Agree			Agree			Everyone
1	0	0	0	in a hurry/ to come later		>35 years	Male		condoms	Other products	Other products		Self	Self					friend/ family member who heard about/participated in the study									1	Afternoon	Male staff	Before posters
1	1	0	0	in a hurry/ to come later		18-24 years	Female	both swa and eng	pgtst	Other products	Other products		Self	Self					friend/ family member who heard about/participated in the study									1	Morning	Female staff	Before posters	ra
1	0	0	0	in a hurry/ to come later		>35 years	Male		mal	Other products	Other products		Self	Self					friend/ family member who heard about/participated in the study									1	Morning	Female staff	Before posters
1	0	0	0	in a hurry/ to come later		25-35 years	Male		mal	Other products	Other products		Self	Self					friend/ family member who heard about/participated in the study									1	Evening	Female staff	Before posters
1	0	0	0	in a hurry/ to come later		25-35 years	Male		mal	Other products	Other products		Self	Self					friend/ family member who heard about/participated in the study									1	Evening	Female staff	Before posters
1	0	0	0	declined		>35 years	Female		mal	Other products	Other products		Self	Self					friend/ family member who heard about/participated in the study									1	Afternoon	Female staff	Before posters
1	1	1	1		1	18-24 years	Female	both swa and eng	hivtst	Other HIV test	HIV testing		Self	Self		No		No	friend/ family member who heard about/participated in the study	Yes	pregnancy	No	>=4	within last 12 months	Employment/ travel/ donating blood	Private hospital/ clinic (including NGO, CBO and faith-based facilities)	I didnt choose myself, I had gone for other services	4	Evening	Male staff	After posters	ra	In-pharmacy test	Yes		RA2: client wanted a document showing the results. explained that we dont issue documented results	Neg	Yes	Sex partner	Very easy		Strongly agree	it is good for one to know his/her status	Strongly agree	Agree	Strongly agree	people trust phamacies	Everyone	Everyone
1	1	1	1		1	>35 years	Male	both swa and eng	hivtst	HST	HIV testing	hst	Self	Self		No		No	friend/ family member who heard about/participated in the study	No		Yes	>=4	within last 12 months	Encouraged by sex partner	Private hospital/ clinic (including NGO, CBO and faith-based facilities)	Easily accessible	4	Evening	Male staff	After posters	ra	In-pharmacy test	Yes		RA2: client wanted a document showing the results. explained that we dont issue documented results	Neg	No		Very easy		Agree	nice to know yours status	Strongly agree	Agree	Strongly agree	easily accesable and available	Everyone	Everyone
1	1	1	1		1	>35 years	Male	both swa and eng	hivtst	Other HIV test	HIV testing		Self	Self		Yes	determine	No	friend/ family member who heard about/participated in the study	No		Yes	>=4	within last 12 months	To plan the future/ getting married/ take charge over one's health	Private hospital/ clinic (including NGO, CBO and faith-based facilities)	Easily accessible	4	Evening	Male staff	After posters	ra	Over the counter	No			Neg	Yes	Friend	Easy		Strongly agree		Agree	Agree	Agree		The youth	The youth
1	1	1	1		1	25-35 years	Male	both swa and eng	hivtst	Other HIV test	HIV testing		Self	Self		Yes	determine	No	friend/ family member who heard about/participated in the study	No		No	>=4	within last 12 months	To understand illness or symptoms that I had	Private hospital/ clinic (including NGO, CBO and faith-based facilities)	Easily accessible	4	Evening	Male staff	After posters	psp	Over the counter	No			Neg	No		Very easy		Agree		Agree	Agree	Strongly agree		The youth	The youth
1	1	1	1		1	25-35 years	Male	both swa and eng	hivtst	Other HIV test	HIV testing		Self	Self		Yes	determine	No	friend/ family member who heard about/participated in the study	Yes	malaria	Yes	>=4	within last 12 months	To plan the future/ getting married/ take charge over one's health	Private hospital/ clinic (including NGO, CBO and faith-based facilities)	Easily accessible	4	Evening	Male staff	After posters	psp	Over the counter	No			Neg	No		Easy		Agree		Agree	Agree	Agree		Everyone	The youth
1	0	0	0	in a hurry/ to come later		>35 years	Male		condoms	Other products	Other products		Self	Self					friend/ family member who heard about/participated in the study									4	Night	Male staff	After posters
1	0	0	0	in a hurry/ to come later		18-24 years	Female		pgtst	Other products	Other products		Self	Self					friend/ family member who heard about/participated in the study									4	Night	Male staff	After posters
1	0	0	0	in a hurry/ to come later		25-35 years	Female		oc	Other products	Other products		Self	Self					friend/ family member who heard about/participated in the study									4	Night	Male staff	After posters
1	0	0	0	in a hurry/ to come later		18-24 years	Female		epill	Other products	Other products		Self	Self					friend/ family member who heard about/participated in the study									4	Night	Male staff	After posters
1	1	1	1		1	18-24 years	Female	both swa and eng	hivtst	Other HIV test	HIV testing		Self	Self		Yes	khb	No	friend/ family member who heard about/participated in the study	Yes	pregnancy	Yes	3	within last 12 months	Encouraged by friend or family member	self-testing	Confidential/ private/ discreet	4	Afternoon	Male staff	After posters	ra	In-pharmacy test	No			Neg	Yes	Sex partner	Very easy		Strongly agree	its easy , cheap	Strongly agree	Strongly agree	Strongly agree	its easy here because counselors are present	The youth	The youth
1	1	1	1		1	25-35 years	Male	both swa and eng	hivtst	Other HIV test	HIV testing		Self	Self		No		No	friend/ family member who heard about/participated in the study	No		Yes	1	within last 12 months	Encouraged by sex partner	Private hospital/ clinic (including NGO, CBO and faith-based facilities)	Presence of skilled staff/ quality services/ information/ support	4	Afternoon	Male staff	After posters	ra	In-pharmacy test	No		RA2: client suggested that before the kit is rolled out it should be advertised properly so that people can be aware of the new kind of test kit. OBS: client was very impressed with the new method of testing	Neg	Yes	Sex partner	Easy		Strongly agree	its a good idea but its going to be challenging for people who dont know how to use the kits	Strongly agree	Strongly agree	Strongly agree	i think its the best place	Sexually active	Sexually active
1	1	1	1		1	>35 years	Male	both swa and eng	hivtst	Other HIV test	HIV testing		Self	Self		No		No	friend/ family member who heard about/participated in the study	No		Yes	2	earlier than 12 months ago	To plan the future/ getting married/ take charge over one's health	Private hospital/ clinic (including NGO, CBO and faith-based facilities)	Confidential/ private/ discreet	4	Evening	Male staff	After posters	psp	Over the counter	Yes		RA2: client suggested that the kits be made available also to ANC mothers so that they can easily and privately test themselves	Neg	Yes	Sex partner	Easy		Agree	privacy purposes	Strongly agree	Agree	Strongly agree	because phamacies are widely spread and staff are easy to talk to	Adults	Sex workers
1	1	1	1		1	25-35 years	Female	both swa and eng	hivtst	HST	HIV testing	hst	Self	Self		No		No	friend/ family member who heard about/participated in the study	Yes	pregnancy	Yes	1	earlier than 12 months ago	To plan the future/ getting married/ take charge over one's health	Private hospital/ clinic (including NGO, CBO and faith-based facilities)	Confidential/ private/ discreet	4	Evening	Male staff	After posters	psp	Over the counter	Yes		RA2: client reported that she did not get results due to the fact that she wrongly placed the kit in the buffer thus results turned invalid. Advised to retest at vct/ hf of her choice	Invalid	Yes	Sex partner	Difficult		Agree	for privacy purposes	Strongly agree	Agree	Strongly agree	nobody bothers you when you buy things in the pharmacy	Adults	Adults
1	1	1	1		1	25-35 years	Female	both swa and eng	hivtst	Other HIV test	HIV testing		Self	Self		Yes	unknown	No	friend/ family member who heard about/participated in the study	Yes	diabetes	Yes	3	within last 12 months	To understand illness or symptoms that I had	Private hospital/ clinic (including NGO, CBO and faith-based facilities)	Presence of skilled staff/ quality services/ information/ support	4	Afternoon	Male staff	After posters	psp	Over the counter	No			Neg	No		Very easy		Disagree	lack of a counselor	Undecided	Strongly agree	Agree	a phamacy is the best place to but a chemist is different because they are many and staff are illiterate	Adults	Other
1	0	0	0	in a hurry/ to come later		>35 years	Male		mal	Other products	Other products		Self	Self					friend/ family member who heard about/participated in the study									1	Morning	Female staff	Before posters
1	1	1	1		1	>35 years	Female	both swa and eng	hivtst	Other HIV test	HIV testing		Self	Self		No		No	friend/ family member who heard about/participated in the study	Yes	pregnancy	Yes	2	within last 12 months	Possible exposure to HIV	Government hospital/ clinic	Presence of skilled staff/ quality services/ information/ support	1	Afternoon	Female staff	Before posters	ra	Over the counter	No			Neg	Yes	Sex partner	Very easy		Agree	its easier and liable , it takes less time	Strongly agree	Agree	Strongly agree	most people trust pharmacies	Married couples	Married couples
1	1	1	0	no money		25-35 years	Female	swa only	mal	Other products	Other products		Self	Self		No		No	friend/ family member who heard about/participated in the study	Yes	pregnancy	Yes	>=4	within last 12 months	Possible exposure to HIV	Government hospital/ clinic	Easily accessible	1	Afternoon	Female staff	Before posters	ra										Agree	it will help those who can go to the VCT		Agree			The youth
1	0	0	0	in a hurry/ to come later		18-24 years	Female		epill	Other products	Other products		Self	Self					friend/ family member who heard about/participated in the study									1	Afternoon	Female staff	Before posters
1	0	0	0	in a hurry/ to come later		18-24 years	Female		sti	Other products	Other products		Self	Self					friend/ family member who heard about/participated in the study									1	Afternoon	Male staff	Before posters
1	0	0	0	declined		25-35 years	Male		condoms	Other products	Other products		Self	Self					friend/ family member who heard about/participated in the study									1	Afternoon	Male staff	Before posters
1	0	0	0	in a hurry/ to come later		25-35 years	Female		epill	Other products	Other products		Self	Self					friend/ family member who heard about/participated in the study									1	Evening	Male staff	Before posters
1	0	0	0	in a hurry/ to come later		>35 years	Male		hivtst	Other HIV test	HIV testing		Self	Self					friend/ family member who heard about/participated in the study									1	Afternoon	Female staff	Before posters
1	0	0	0	in a hurry/ to come later		18-24 years	Female		oc	Other products	Other products		Self	Self					friend/ family member who heard about/participated in the study									1	Afternoon	Female staff	Before posters
1	1	1	1		1	>35 years	Male	both swa and eng	hivtst	Other HIV test	HIV testing		Self	Self		Yes	determine	No	friend/ family member who heard about/participated in the study	No		Yes	>=4	within last 12 months	Possible exposure to HIV	Mobile testing service	Easily accessible	1	Evening	Female staff	Before posters	ra	Over the counter				Neg	Yes	Sex partner	Very easy		Agree	people will be able to know their status	Strongly agree	Agree	Strongly agree	because chemists reach out to alot of people	Everyone	Everyone
1	1	1	1		1	25-35 years	Female	both swa and eng	hivtst	HST	HIV testing	hst	Self	Self		No		No	friend/ family member who heard about/participated in the study	Yes	pregnancy	Yes	3	within last 12 months	Possible exposure to HIV	Government hospital/ clinic	Easily accessible	1	Evening	Female staff	Before posters	ra	Over the counter				Neg	Yes	Sex partner	Very easy		Agree	because everybody is at risk of this disease	Strongly agree	Agree	Strongly agree	no queing and it saves time	The youth	The youth
1	0	0	0	in a hurry/ to come later		25-35 years	Female		pgtst	Other products	Other products		Self	Self					friend/ family member who heard about/participated in the study									1	Evening	Female staff	Before posters
1	1	1	1		0	25-35 years	Male	both swa and eng	hivtst	HST	HIV testing	hst	Self	Self		No		No	friend/ family member who heard about/participated in the study	No		No	>=4	within last 12 months	Possible exposure to HIV	Private hospital/ clinic (including NGO, CBO and faith-based facilities)	Easily accessible	1	Evening	Male staff	Before posters	ra	Over the counter		unreachable on phone	RA2: phone switched off or out of range						Agree	for those who cant open up can use the kit		Agree			The youth
1	0	0	0	in a hurry/ to come later		>35 years	Male		mal	Other products	Other products		Self	Self					friend/ family member who heard about/participated in the study									1	Morning	Female staff	Before posters
1	0	0	0	in a hurry/ to come later		>35 years	Male		mal	Other products	Other products		Self	Self					friend/ family member who heard about/participated in the study									1	Morning	Female staff	Before posters
1	0	0	0	in a hurry/ to come later		25-35 years	Male		sti	Other products	Other products		Other	Family member					friend/ family member who heard about/participated in the study									1	Afternoon	Female staff	Before posters
1	0	0	0	in a hurry/ to come later		18-24 years	Female		pgtst	Other products	Other products		Self	Self					friend/ family member who heard about/participated in the study									1	Morning	Female staff	Before posters
1	0	0	0	in a hurry/ to come later		>35 years	Female		hivtst	Other HIV test	HIV testing		Self	Self					friend/ family member who heard about/participated in the study									1	Morning	Male staff	Before posters
1	1	1	1		1	18-24 years	Female	both swa and eng	hivtst	HST	HIV testing	hst	Self	Self		No		No	friend/ family member who heard about/participated in the study	Yes	pregnancy	Yes	3	earlier than 12 months ago	To understand illness or symptoms that I had	Mobile testing service	Easily accessible	1	Evening	Female staff	Before posters	ra	Over the counter				Neg	Yes	Friend	Very easy		Strongly agree	SINCE MOST PEOPLE ARE SCARED OF TESTING	Strongly agree	Strongly agree	Strongly agree	faster services than hospitals	Everyone	The youth
1	0	0	0	in a hurry/ to come later		25-35 years	Male		sti	Other products	Other products		Self	Self					friend/ family member who heard about/participated in the study									1	Afternoon	Female staff	Before posters
1	1	1	1		1	>35 years	Female	both swa and eng	hivtst	Other HIV test	HIV testing		Self	Self		No		No	friend/ family member who heard about/participated in the study	No		No	3	earlier than 12 months ago	Advice from doctor or health provider/ ANC invitation	Government hospital/ clinic	I didnt choose myself, I had gone for other services	1	Evening	Male staff	Before posters	ra	In-pharmacy test	No		RA2: referred to george's clinic, but later enrolled at mtwapa HC. confirmatory testing was delayed as client did not have time.	Pos	No		Easy	Yes	Agree	it is an easy for one to know their status	Agree	Agree	Strongly agree	people will come in numbers	The youth	Everyone
1	0	0	0	in a hurry/ to come later		18-24 years	Female		pgtst	Other products	Other products		Self	Self					friend/ family member who heard about/participated in the study									1	Evening	Male staff	Before posters
1	0	0	0	declined		>35 years	Male		mal	Other products	Other products		Self	Self					friend/ family member who heard about/participated in the study									1	Morning	Female staff	Before posters
1	0	0	0	in a hurry/ to come later		>35 years	Male		mal	Other products	Other products		Self	Self					friend/ family member who heard about/participated in the study									1	Morning	Female staff	Before posters
1	0	0	0	in a hurry/ to come later		>35 years	Male		mal	Other products	Other products		Self	Self					friend/ family member who heard about/participated in the study									1	Morning	Female staff	Before posters
1	0	0	0	in a hurry/ to come later		25-35 years	Female		pgtst	Other products	Other products		Self	Self					friend/ family member who heard about/participated in the study									1	Afternoon	Female staff	Before posters
1	0	0	0	in a hurry/ to come later		>35 years	Male		mal	Other products	Other products		Self	Self					friend/ family member who heard about/participated in the study									1	Morning	Female staff	Before posters
1	0	0	0	in a hurry/ to come later		25-35 years	Male		perform	Other products	Other products		Self	Self					friend/ family member who heard about/participated in the study									3	Afternoon	Female staff	Before posters
1	0	0	0	in a hurry/ to come later		>35 years	Male		epill	Other products	Other products		Other	Partner					friend/ family member who heard about/participated in the study									3	Evening	Male staff	Before posters
1	0	0	0	in a hurry/ to come later		>35 years	Male		perform	Other products	Other products		Self	Self					friend/ family member who heard about/participated in the study									3	Afternoon	Male staff	Before posters
1	0	0	0	in a hurry/ to come later		18-24 years	Female		epill	Other products	Other products		Self	Self					friend/ family member who heard about/participated in the study									3	Night	Male staff	Before posters
1	1	1	1		0	25-35 years	Male	both swa and eng	mal	Other products	Other products		Self	Self		Yes	khb	No	friend/ family member who heard about/participated in the study	No		No	>=4	within last 12 months	To understand illness or symptoms that I had	self-testing	Easily accessible	3	Night	Male staff	Before posters	ra	Over the counter		unreachable on phone	RA2: not picking up after several attempts						Strongly agree	due to confidentiality		Agree			Adults
1	1	1	1		1	25-35 years	Female	both swa and eng	hivtst	Other HIV test	HIV testing		Self	Self		No		No	friend/ family member who heard about/participated in the study	Yes	pregnancy	No	>=4	within last 12 months	To understand illness or symptoms that I had	Private hospital/ clinic (including NGO, CBO and faith-based facilities)	Easily accessible	3	Afternoon	Female staff	Before posters	ra	In-pharmacy test	No		RA2: the client was able to follow all the stepsexcept of that of placing tube at the stand the client was tempted to pour the solution into the stand	Neg	No		Easy		Agree	ITS AN EASY WAY FOR SOMEONE TO KNOW THEIR STATUS	Strongly agree	Strongly agree	Strongly agree	many people will come for the test	Everyone	Everyone
1	1	1	1		1	25-35 years	Female	both swa and eng	hivtst	Other HIV test	HIV testing		Self	Self		No		No	friend/ family member who heard about/participated in the study	No		Yes	>=4	within last 12 months	Possible exposure to HIV	Private hospital/ clinic (including NGO, CBO and faith-based facilities)	Easily accessible	3	Afternoon	Female staff	Before posters	ra	In-pharmacy test	No			Neg	No		Very easy		Strongly agree	BECAUSE IT IS EASY AND SOMEONE CAN TEST ANYWHERE	Strongly agree	Strongly agree	Strongly agree		Everyone	Everyone
1	0	0	0	in a hurry/ to come later		25-35 years	Female		mal	Other products	Other products		Self	Self					friend/ family member who heard about/participated in the study									3	Afternoon	Female staff	Before posters
1	0	0	0	in a hurry/ to come later		18-24 years	Male		pgtst	Other products	Other products		Other	Partner					friend/ family member who heard about/participated in the study									3	Morning	Female staff	Before posters
1	0	0	0	in a hurry/ to come later		25-35 years	Female		oc	Other products	Other products		Self	Self					friend/ family member who heard about/participated in the study									3	Afternoon	Male staff	Before posters
1	0	0	0	in a hurry/ to come later		25-35 years	Female		oc	Other products	Other products		Self	Self					friend/ family member who heard about/participated in the study									3	Evening	Male staff	Before posters
1	0	0	0	in a hurry/ to come later		18-24 years	Female		pgtst	Other products	Other products		Self	Self					friend/ family member who heard about/participated in the study									3	Evening	Male staff	Before posters
1	0	0	0	in a hurry/ to come later		25-35 years	Male		perform	Other products	Other products		Self	Self					friend/ family member who heard about/participated in the study									3	Evening	Male staff	Before posters
1	0	0	0	in a hurry/ to come later		25-35 years	Male		pgtst	Other products	Other products		Other	Partner					friend/ family member who heard about/participated in the study									3	Morning	Female staff	Before posters
1	0	0	0	in a hurry/ to come later		18-24 years	Female		epill	Other products	Other products		Self	Self					friend/ family member who heard about/participated in the study									3	Afternoon	Female staff	Before posters
1	1	1	1		1	25-35 years	Female	both swa and eng	hivtst	HST	HIV testing	hst	Self	Self		No		No	friend/ family member who heard about/participated in the study	Yes	pregnancy	No	>=4	within last 12 months	To understand illness or symptoms that I had	Government hospital/ clinic	Easily accessible	3	Afternoon	Female staff	Before posters	ra	Over the counter				Neg	Yes	Sex partner	Very easy		Strongly agree	people will get to know their HIV status easily	Strongly agree	Strongly agree	Strongly agree	theres privacy	The youth	The youth
1	1	1	1		1	25-35 years	Female	both swa and eng	hivtst	HST	HIV testing	hst	Self	Self		No		Yes	friend/ family member who heard about/participated in the study	No		No	3	within last 12 months	Advice from doctor or health provider/ ANC invitation	Private hospital/ clinic (including NGO, CBO and faith-based facilities)	I didnt choose myself, I had gone for other services	3	Afternoon	Female staff	Before posters	ra	Over the counter	No			Neg	Yes	Family member	Very easy		Strongly agree	so that people know their status	Strongly agree	Agree	Strongly agree	most people trust chemists	Everyone	Everyone
1	0	0	0	in a hurry/ to come later		25-35 years	Female		epill	Other products	Other products		Self	Self					friend/ family member who heard about/participated in the study									3	Evening	Female staff	Before posters
1	0	0	0	declined		25-35 years	Male		epill	Other products	Other products		Other	Partner					friend/ family member who heard about/participated in the study									3	Afternoon	Female staff	Before posters
1	1	1	1		1	25-35 years	Male	both swa and eng	hivtst	Other HIV test	HIV testing		Self	Self		No		No	friend/ family member who heard about/participated in the study	Yes	pregnancy	Yes	>=4	within last 12 months	Encouraged by friend or family member	Mobile testing service	Easily accessible	3	Evening	Female staff	Before posters	ra	Over the counter	No			Neg	Yes	Friend	Easy		Strongly agree	many people will get to know their HIV status	Agree	Strongly agree	Agree		Everyone	Everyone
1	1	1	1		1	25-35 years	Female	both swa and eng	hivtst	HST	HIV testing	hst	Self	Self		No		No	friend/ family member who heard about/participated in the study	Yes	pregnancy	No	>=4	within last 12 months	Possible exposure to HIV	Private hospital/ clinic (including NGO, CBO and faith-based facilities)	Easily accessible	3	Morning	Female staff	Before posters	ra	Over the counter	No			Neg	Yes	Sex partner	Very easy		Strongly agree	many people will get to know their status	Agree	Strongly agree	Agree	many people visit phamacies	Everyone	Everyone
1	0	0	0	wanted a blood test		25-35 years	Female		hivtst	Other HIV test	HIV testing		Self	Self					friend/ family member who heard about/participated in the study									3	Morning	Male staff	Before posters
1	1	1	1		1	25-35 years	Female	both swa and eng	hivtst	Other HIV test	HIV testing		Self	Self		No		No	friend/ family member who heard about/participated in the study	Yes	pregnancy	No	3	earlier than 12 months ago	Advice from doctor or health provider/ ANC invitation	Government hospital/ clinic	Easily accessible	3	Afternoon	Male staff	Before posters	ra	In-pharmacy test				Neg	No		Very easy		Strongly agree	there is no pricking and its easy to use	Strongly agree	Strongly agree	Strongly agree	no one can know what you are buying	Everyone	Everyone
1	0	0	0	in a hurry/ to come later		25-35 years	Male		hivtst	Other HIV test	HIV testing		Self	Self					friend/ family member who heard about/participated in the study									3	Afternoon	Male staff	Before posters
1	0	0	0	in a hurry/ to come later		18-24 years	Female		pgtst	Other products	Other products		Self	Self					friend/ family member who heard about/participated in the study									3	Morning	Female staff	Before posters
1	1	1	1		1	25-35 years	Male	both swa and eng	hivtst	HST	HIV testing	hst	Self	Self		No		No	friend/ family member who heard about/participated in the study	No		No	>=4	earlier than 12 months ago	To understand illness or symptoms that I had	Government hospital/ clinic	Easily accessible	3	Evening	Male staff	Before posters	ra	In-pharmacy test				Neg	No		Very easy		Agree	to know one self and stay well is good	Strongly agree	Strongly agree	Agree	its a trusted place by many	Adults	Adults
1	0	0	0	in a hurry/ to come later		25-35 years	Female		hivtst	Other HIV test	HIV testing		Self	Self					friend/ family member who heard about/participated in the study									3	Afternoon	Male staff	Before posters
1	1	1	1		1	25-35 years	Female	both swa and eng	hivtst	HST	HIV testing	hst	Self	Self		Yes	khb	No	friend/ family member who heard about/participated in the study	Yes	pregnancy	Yes	>=4	within last 12 months	To understand illness or symptoms that I had	self-testing	Confidential/ private/ discreet	3	Afternoon	Male staff	After posters	ra	Over the counter	No			Neg	Yes	Sex partner	Very easy		Strongly agree	for people to know their status	Agree	Strongly agree	Agree		The youth	Everyone
1	1	1	1		1	18-24 years	Female	both swa and eng	hivtst	Other HIV test	HIV testing		Self	Self		No		No	friend/ family member who heard about/participated in the study	Yes	pregnancy	Yes	>=4	within last 12 months	Possible exposure to HIV	Private hospital/ clinic (including NGO, CBO and faith-based facilities)	Easily accessible	3	Evening	Male staff	After posters	ra	Over the counter	No			Neg	Yes	Sex partner	Very easy		Agree	so that everyone can know his or her status	Strongly agree	Agree	Strongly agree		Adults	The youth
1	0	0	0	in a hurry/ to come later		25-35 years	Female		hivtst	Other HIV test	HIV testing		Self	Self					friend/ family member who heard about/participated in the study									5	Afternoon	Female staff	Before posters
1	0	0	0	in a hurry/ to come later		25-35 years	Male		perform	Other products	Other products		Self	Self					friend/ family member who heard about/participated in the study									5	Evening	Female staff	Before posters
1	0	0	0	in a hurry/ to come later		>35 years	Male		epill	Other products	Other products		Self	Self					friend/ family member who heard about/participated in the study									5	Evening	Female staff	Before posters
1	1	1	1		1	>35 years	Male	both swa and eng	hivtst	HST	HIV testing	hst	Self	Self		No		No	friend/ family member who heard about/participated in the study	No		Yes	3	within last 12 months	To understand illness or symptoms that I had	Government hospital/ clinic	Easily accessible	5	Afternoon	Female staff	Before posters	ra	Over the counter				Neg	Yes	Friend	Easy		Agree	so that clients can know how to take up results	Agree	Agree	Agree		Everyone	Everyone
1	0	0	0	in a hurry/ to come later		25-35 years	Male		perform	Other products	Other products		Self	Self					friend/ family member who heard about/participated in the study									5	Morning	Female staff	Before posters
1	0	0	0	in a hurry/ to come later		25-35 years	Female		mal	Other products	Other products		Self	Self					friend/ family member who heard about/participated in the study									5	Afternoon	Female staff	Before posters
1	0	0	0	in a hurry/ to come later		18-24 years	Female		epill	Other products	Other products		Self	Self					friend/ family member who heard about/participated in the study									5	Afternoon	Female staff	Before posters
1	0	0	0	in a hurry/ to come later		18-24 years	Female		epill	Other products	Other products		Self	Self					friend/ family member who heard about/participated in the study									5	Night	Female staff	Before posters
1	0	0	0	in a hurry/ to come later		18-24 years	Male		sti	Other products	Other products		Self	Self					friend/ family member who heard about/participated in the study									5	Morning	Female staff	Before posters
1	0	0	0	in a hurry/ to come later		25-35 years	Male		mal	Other products	Other products	kp	Self	Self					friend/ family member who heard about/participated in the study									5	Morning	Female staff	Before posters
1	1	0	0	in a hurry/ to come later		25-35 years	Female	both swa and eng	pgtst	Other products	Other products		Self	Self					friend/ family member who heard about/participated in the study									5	Morning	Female staff	Before posters	ra
1	1	0	0	no money		25-35 years	Male	both swa and eng	sti	Other products	Other products		Other	Family member					friend/ family member who heard about/participated in the study									5	Morning	Female staff	Before posters	ra
1	1	0	0	no money		25-35 years	Female	both swa and eng	sti	Other products	Other products		Other	Family member					friend/ family member who heard about/participated in the study									5	Morning	Female staff	Before posters	ra
1	0	0	0	in a hurry/ to come later		>35 years	Male		perform	Other products	Other products		Self	Self					friend/ family member who heard about/participated in the study									5	Night	Female staff	Before posters
1	0	0	0	in a hurry/ to come later		>35 years	Male		perform	Other products	Other products		Self	Self					friend/ family member who heard about/participated in the study									5	Evening	Female staff	Before posters
1	0	0	0	in a hurry/ to come later		25-35 years	Male		perform	Other products	Other products		Self	Self					friend/ family member who heard about/participated in the study									5	Night	Female staff	Before posters
1	0	0	0	in a hurry/ to come later		25-35 years	Male		perform	Other products	Other products		Self	Self					friend/ family member who heard about/participated in the study									5	Night	Female staff	Before posters
1	0	0	0	in a hurry/ to come later		>35 years	Male		perform	Other products	Other products		Self	Self					friend/ family member who heard about/participated in the study									5	Night	Female staff	Before posters
1	0	0	0	in a hurry/ to come later		18-24 years	Female		pgtst	Other products	Other products		Self	Self					friend/ family member who heard about/participated in the study									5	Night	Female staff	Before posters
1	0	0	0	in a hurry/ to come later		25-35 years	Female		pgtst	Other products	Other products		Self	Self					friend/ family member who heard about/participated in the study									5	Morning	Female staff	Before posters
1	1	0	0	in a hurry/ to come later		25-35 years	Female	both swa and eng	epill	Other products	Other products		Self	Self					friend/ family member who heard about/participated in the study									5	Afternoon	Female staff	Before posters	ra
1	0	0	0	in a hurry/ to come later		25-35 years	Female		pgtst	Other products	Other products		Self	Self					friend/ family member who heard about/participated in the study									5	Morning	Female staff	Before posters
1	0	0	0	in a hurry/ to come later		25-35 years	Female		sti	Other products	Other products		Self	Self					friend/ family member who heard about/participated in the study									5	Morning	Female staff	Before posters
1	0	0	0	in a hurry/ to come later		18-24 years	Female		epill	Other products	Other products		Self	Self					friend/ family member who heard about/participated in the study									5	Night	Female staff	Before posters
1	1	0	0	no money		25-35 years	Male	both swa and eng	perform	Other products	Other products		Self	Self					friend/ family member who heard about/participated in the study									5	Night	Female staff	Before posters	ra
1	0	0	0	in a hurry/ to come later		18-24 years	Female		pgtst	Other products	Other products		Other	Family member					friend/ family member who heard about/participated in the study									5	Morning	Female staff	Before posters
1	1	0	0	no money		25-35 years	Female	both swa and eng	pgtst	Other products	Other products		Self	Self					friend/ family member who heard about/participated in the study									5	Afternoon	Female staff	Before posters	ra
1	0	0	0	in a hurry/ to come later		25-35 years	Female		pgtst	Other products	Other products		Self	Self					friend/ family member who heard about/participated in the study									5	Morning	Female staff	Before posters
1	0	0	0	in a hurry/ to come later		25-35 years	Female		pgtst	Other products	Other products		Self	Self					friend/ family member who heard about/participated in the study									5	Night	Female staff	Before posters
1	0	0	0	in a hurry/ to come later		25-35 years	Male		hivtst	Other HIV test	HIV testing		Self	Self					friend/ family member who heard about/participated in the study									1	Afternoon	Male staff	Before posters
1	1	1	1		1	25-35 years	Male	both swa and eng	hivtst	Other HIV test	HIV testing		Self	Self		No		No	friend/ family member who heard about/participated in the study	No		No	>=4	earlier than 12 months ago	To understand illness or symptoms that I had	Mobile testing service	Easily accessible	1	Evening	Female staff	Before posters	ra	Over the counter				Neg	Yes	Friend	Easy		Strongly agree	it will help people know their status	Strongly agree	Strongly agree	Agree		The youth	The youth
1	0	0	0	declined		>35 years	Male		mal	Other products	Other products		Self	Self					friend/ family member who heard about/participated in the study									1	Morning	Female staff	Before posters
1	0	0	0	declined		>35 years	Female		mal	Other products	Other products		Self	Self					friend/ family member who heard about/participated in the study									1	Evening	Female staff	Before posters
1	0	0	0	declined		18-24 years	Male		mal	Other products	Other products		Self	Self					friend/ family member who heard about/participated in the study									1	Morning	Male staff	Before posters
1	0	0	0	in a hurry/ to come later		25-35 years	Female		pgtst	Other products	Other products		Other	Other	friend				friend/ family member who heard about/participated in the study									1	Afternoon	Male staff	Before posters
1	0	0	0	declined		18-24 years	Female		epill	Other products	Other products		Self	Self					friend/ family member who heard about/participated in the study									1	Morning	Female staff	Before posters
1	0	0	0	in a hurry/ to come later		18-24 years	Female		epill	Other products	Other products		Self	Self					friend/ family member who heard about/participated in the study									1	Evening	Male staff	Before posters
1	1	1	1		1	18-24 years	Female	both swa and eng	mal	Other products	Other products		Self	Self		No		No	friend/ family member who heard about/participated in the study	No		Yes	>=4	within last 12 months	To understand illness or symptoms that I had	Government hospital/ clinic	Easily accessible	1	Morning	Female staff	Before posters	ra	Over the counter				Neg	No		Very easy		Strongly agree	since one will be able to know his or her status	Strongly agree	Strongly agree	Strongly agree	those who cant visit VCT sites will be able to test	The youth	The youth
1	0	0	0	in a hurry/ to come later		25-35 years	Male		mal	Other products	Other products		Self	Self					friend/ family member who heard about/participated in the study									1	Afternoon	Female staff	Before posters
1	0	0	0	in a hurry/ to come later		25-35 years	Female		epill	Other products	Other products		Self	Self					friend/ family member who heard about/participated in the study									1	Afternoon	Female staff	Before posters
1	0	0	0	in a hurry/ to come later		18-24 years	Female		sti	Other products	Other products		Self	Self					friend/ family member who heard about/participated in the study									1	Morning	Male staff	Before posters
1	0	0	0	declined		25-35 years	Female		mal	Other products	Other products		Other	Family member					friend/ family member who heard about/participated in the study									1	Afternoon	Female staff	Before posters
1	0	0	0	in a hurry/ to come later		18-24 years	Female		pgtst	Other products	Other products		Self	Self					friend/ family member who heard about/participated in the study									1	Afternoon	Female staff	Before posters
1	0	0	0	in a hurry/ to come later		25-35 years	Female		mal	Other products	Other products		Self	Self					friend/ family member who heard about/participated in the study									1	Evening	Male staff	Before posters
1	0	0	0	declined		>35 years	Male		pgtst	Other products	Other products		Other	Family member					friend/ family member who heard about/participated in the study									1	Morning	Male staff	Before posters
1	1	1	1		1	25-35 years	Male	both swa and eng	hivtst	Other HIV test	HIV testing		Self	Self		No		No	friend/ family member who heard about/participated in the study	No		No	>=4	within last 12 months	Advice from doctor or health provider/ ANC invitation	Private hospital/ clinic (including NGO, CBO and faith-based facilities)	Easily accessible	1	Afternoon	Male staff	Before posters	ra	Over the counter				Neg	Yes	Family member	Very easy		Strongly agree		Agree	Strongly agree	Strongly agree	not being able to go see a doctor	The youth	Other
1	0	0	0	in a hurry/ to come later		>35 years	Male		mal	Other products	Other products		Other	Family member					friend/ family member who heard about/participated in the study									1	Evening	Female staff	Before posters
1	0	0	0	in a hurry/ to come later		25-35 years	Female		mal	Other products	Other products		Self	Self					friend/ family member who heard about/participated in the study									1	Evening	Female staff	Before posters
1	0	0	0	in a hurry/ to come later		>35 years	Male		oc	Other products	Other products		Other	Partner					friend/ family member who heard about/participated in the study									1	Afternoon	Female staff	Before posters
1	0	0	0	in a hurry/ to come later		25-35 years	Male		mal	Other products	Other products		Self	Self					friend/ family member who heard about/participated in the study									1	Morning	Female staff	Before posters
1	0	0	0	declined		25-35 years	Female		epill	Other products	Other products		Self	Self					friend/ family member who heard about/participated in the study									1	Morning	Female staff	Before posters
1	0	0	0	in a hurry/ to come later		>35 years	Male		mal	Other products	Other products		Self	Self					friend/ family member who heard about/participated in the study									1	Morning	Female staff	Before posters
1	0	0	0	in a hurry/ to come later		>35 years	Male		mal	Other products	Other products		Self	Self					friend/ family member who heard about/participated in the study									1	Morning	Female staff	Before posters
1	1	1	1		1	25-35 years	Male	both swa and eng	hivtst	Other HIV test	HIV testing		Self	Self		No		No	friend/ family member who heard about/participated in the study	No		Yes	>=4	within last 12 months	Advice from doctor or health provider/ ANC invitation	Private hospital/ clinic (including NGO, CBO and faith-based facilities)	Easily accessible	1	Afternoon	Female staff	Before posters	ra	Over the counter	No			Neg	Yes	Sex partner	Very easy		Agree	SO THAT PEOPLE CAN KNOW THEIR STATUS	Strongly agree	Strongly agree	Strongly agree	many people love chemists	Married couples	Married couples
1	0	0	0	in a hurry/ to come later		25-35 years	Female		oc	Other products	Other products		Self	Self					friend/ family member who heard about/participated in the study									1	Morning	Female staff	Before posters
1	1	1	1		1	18-24 years	Female	both swa and eng	pgtst	Other products	Other products		Self	Self		No		No	friend/ family member who heard about/participated in the study	Yes	pregnancy	No	>=4	earlier than 12 months ago	Possible exposure to HIV	Private hospital/ clinic (including NGO, CBO and faith-based facilities)	Easily accessible	1	Afternoon	Female staff	Before posters	ra	Over the counter	No			Neg	Yes	Family member	Very easy		Agree	ITS BETTER	Strongly agree	Strongly agree	Strongly agree	it will help those who dont have time to go to vct sites	The youth	The youth
1	0	0	0	in a hurry/ to come later		18-24 years	Female		epill	Other products	Other products		Self	Self					friend/ family member who heard about/participated in the study									1	Afternoon	Male staff	Before posters
1	0	0	0	in a hurry/ to come later		25-35 years	Female		epill	Other products	Other products		Self	Self					friend/ family member who heard about/participated in the study									5	Morning	Female staff	Before posters
1	0	0	0	in a hurry/ to come later		>35 years	Male		perform	Other products	Other products		Self	Self					friend/ family member who heard about/participated in the study									5	Afternoon	Female staff	Before posters
1	0	0	0	in a hurry/ to come later		18-24 years	Female		epill	Other products	Other products		Self	Self					friend/ family member who heard about/participated in the study									5	Night	Female staff	Before posters
1	0	0	0	in a hurry/ to come later		25-35 years	Male		perform	Other products	Other products		Self	Self					friend/ family member who heard about/participated in the study									5	Night	Female staff	Before posters
1	0	0	0	in a hurry/ to come later		25-35 years	Male		hivtst	Other HIV test	HIV testing		Self	Self					friend/ family member who heard about/participated in the study									5	Afternoon	Female staff	Before posters
1	1	1	1		1	25-35 years	Male	both swa and eng	hivtst	HST	HIV testing	hst	Self	Self		No		No	friend/ family member who heard about/participated in the study	Yes	diabetes	Yes	1	earlier than 12 months ago	Encouraged by sex partner	Private hospital/ clinic (including NGO, CBO and faith-based facilities)	Easily accessible	5	Evening	Female staff	Before posters	ra	Over the counter				Neg	Yes	Sex partner	Easy		Strongly agree	because people fear government facilities and stigmatisation by staff	Strongly agree	Agree	Strongly agree	they are all over	The youth	The youth
1	0	0	0	in a hurry/ to come later		25-35 years	Male		perform	Other products	Other products		Self	Self					friend/ family member who heard about/participated in the study									5	Evening	Female staff	Before posters
1	0	0	0	in a hurry/ to come later		25-35 years	Female		epill	Other products	Other products		Self	Self					friend/ family member who heard about/participated in the study									5	Morning	Female staff	Before posters
1	0	0	0	in a hurry/ to come later		>35 years	Male		mal	Other products	Other products		Self	Self					friend/ family member who heard about/participated in the study									5	Afternoon	Female staff	Before posters
1	1	1	1		1	>35 years	Male	both swa and eng	hivtst	HST	HIV testing	hst	Self	Self		No		Yes	friend/ family member who heard about/participated in the study	No		Yes	1	within last 12 months	Employment/ travel/ donating blood	Government hospital/ clinic	I didnt choose myself, I had gone for other services	5	Afternoon	Female staff	Before posters	ra	Over the counter				Neg	Yes	Sex partner	Very easy		Strongly agree	it is good to access it and know yourself	Strongly agree	Strongly agree	Strongly agree		Everyone	Everyone
1	0	0	0	in a hurry/ to come later		25-35 years	Female		epill	Other products	Other products		Self	Self					friend/ family member who heard about/participated in the study									5	Morning	Female staff	Before posters
1	0	0	0	in a hurry/ to come later		25-35 years	Female		pgtst	Other products	Other products		Self	Self					friend/ family member who heard about/participated in the study									5	Afternoon	Female staff	Before posters
1	0	0	0	in a hurry/ to come later		25-35 years	Female		epill	Other products	Other products		Self	Self					friend/ family member who heard about/participated in the study									5	Afternoon	Female staff	Before posters
1	1	1	1		1	25-35 years	Female	both swa and eng	hivtst	Other HIV test	HIV testing		Self	Self		No		No	friend/ family member who heard about/participated in the study	No		No	1	within last 12 months	To understand illness or symptoms that I had	Government hospital/ clinic	I didnt choose myself, I had gone for other services	5	Afternoon	Female staff	Before posters	ra	Over the counter	No			Neg	No		Easy		Agree	not really some may not be able to inerprete	Strongly agree	Strongly agree	Strongly agree	no cues	The youth	The youth
1	1	1	1		1	25-35 years	Female	both swa and eng	hivtst	Other HIV test	HIV testing		Self	Self		No		No	friend/ family member who heard about/participated in the study	Yes	pregnancy	No	>=4	earlier than 12 months ago	To understand illness or symptoms that I had	Government hospital/ clinic	Easily accessible	5	Night	Male staff	Before posters	ra	In-pharmacy test	No			Neg	Yes	Sex partner	Very easy		Strongly agree		Strongly agree	Strongly agree	Strongly agree		Everyone	Everyone
1	1	1	1		1	>35 years	Female	both swa and eng	hivtst	Other HIV test	HIV testing		Self	Self		No		No	friend/ family member who heard about/participated in the study	No		Yes	2	within last 12 months	Encouraged by sex partner	Government hospital/ clinic	Easily accessible	5	Night	Female staff	Before posters	ra	In-pharmacy test	No			Neg	Yes	Friend	Very easy		Strongly agree		Strongly agree	Agree	Strongly agree	easily accesable	Everyone	Everyone
1	1	1	1		1	25-35 years	Female	both swa and eng	hivtst	Other HIV test	HIV testing		Self	Self		No		No	friend/ family member who heard about/participated in the study	No		Yes	>=4	within last 12 months	Encouraged by sex partner	Private hospital/ clinic (including NGO, CBO and faith-based facilities)	Easily accessible	5	Night	Female staff	Before posters	ra	In-pharmacy test	No			Neg	No		Very easy		Strongly agree		Strongly agree	Strongly agree	Strongly agree		Sex workers	Sex workers
1	0	0	0	in a hurry/ to come later		>35 years	Male		perform	Other products	Other products		Self	Self					friend/ family member who heard about/participated in the study									5	Night	Female staff	Before posters
1	0	0	0	in a hurry/ to come later		25-35 years	Female		epill	Other products	Other products		Self	Self					friend/ family member who heard about/participated in the study									5	Night	Female staff	Before posters
1	1	1	1		1	25-35 years	Female	both swa and eng	hivtst	Other HIV test	HIV testing		Self	Self		Yes	khb	No	friend/ family member who heard about/participated in the study	No		Yes	2	earlier than 12 months ago	Advice from doctor or health provider/ ANC invitation	Government hospital/ clinic	I didnt choose myself, I had gone for other services	5	Afternoon	Female staff	Before posters	ra	In-pharmacy test	No			Neg	Yes	Family member	Very easy		Strongly agree	be able to privately conduct test	Strongly agree	Agree	Agree	they will not fear to come and buy	The youth	The youth
1	0	0	0	declined		18-24 years	Female		pgtst	Other products	Other products		Self	Self					friend/ family member who heard about/participated in the study									5	Night	Female staff	Before posters
1	0	0	0	declined		25-35 years	Female		oc	Other products	Other products		Self	Self					friend/ family member who heard about/participated in the study									5	Morning	Female staff	Before posters
1	0	0	0	in a hurry/ to come later		18-24 years	Female		oc	Other products	Other products		Self	Self					friend/ family member who heard about/participated in the study									5	Morning	Female staff	Before posters
1	1	0	0	declined		18-24 years	Female	both swa and eng	epill	Other products	Other products		Self	Self					friend/ family member who heard about/participated in the study									5	Afternoon	Female staff	Before posters	ra
1	1	1	1		1	25-35 years	Female	both swa and eng	sti	Other products	Other products		Self	Self		No		No	friend/ family member who heard about/participated in the study	Yes	malaria	No	>=4	within last 12 months	To understand illness or symptoms that I had	Government hospital/ clinic	Confidential/ private/ discreet	5	Afternoon	Female staff	Before posters	psp	In-pharmacy test	No			Neg	Yes	Sex partner	Easy		Strongly agree	HIV is on thn rise people should know their status	Strongly agree	Agree	Strongly agree	confidentiality and easy access	The youth	The youth
1	1	0	0	in a hurry/ to come later		18-24 years	Female	both swa and eng	pgtst	Other products	Other products		Self	Self					friend/ family member who heard about/participated in the study									5	Evening	Female staff	Before posters	ra
1	0	0	0	in a hurry/ to come later		25-35 years	Female		sti	Other products	Other products		Self	Self					friend/ family member who heard about/participated in the study									5	Evening	Female staff	Before posters
1	1	1	1		1	25-35 years	Female	both swa and eng	hivtst	Other HIV test	HIV testing		Self	Self		No		No	friend/ family member who heard about/participated in the study	Yes	pregnancy	Yes	1	earlier than 12 months ago	To understand illness or symptoms that I had	Government hospital/ clinic	I didnt choose myself, I had gone for other services	5	Morning	Female staff	Before posters	psp	Over the counter	No		RA2: client tested same day and came after 2 days for post-test	Neg	No		Very easy		Strongly agree		Agree	Strongly agree	Agree	very easy to access and not time consuming	The youth	The youth
1	1	1	1		1	>35 years	Male	both swa and eng	perform	Other products	Other products		Self	Self		No		No	friend/ family member who heard about/participated in the study	Yes	malaria	Yes	3	earlier than 12 months ago	Encouraged by sex partner	VCT/ HTC center	Easily accessible	5	Morning	Female staff	Before posters	psp	Over the counter	No		RA2: client tested at home and came back the same day for post-test	Neg	Yes	Sex partner	Very easy		Strongly agree	HIV is on the rise	Agree	Agree	Strongly agree	confidentiality purposes and time saving	The youth	The youth
1	0	0	0	in a hurry/ to come later		>35 years	Male		sti	Other products	Other products		Self	Self					friend/ family member who heard about/participated in the study									5	Morning	Female staff	Before posters
1	0	0	0	in a hurry/ to come later		25-35 years	Male		epill	Other products	Other products		Other	Partner					friend/ family member who heard about/participated in the study									1	Morning	Male staff	Before posters
1	1	1	1		1	25-35 years	Male	both swa and eng	hivtst	Other HIV test	HIV testing		Self	Self		Yes	khb	No	friend/ family member who heard about/participated in the study	No		No	>=4	within last 12 months	To understand illness or symptoms that I had	Private hospital/ clinic (including NGO, CBO and faith-based facilities)	Presence of skilled staff/ quality services/ information/ support	1	Afternoon	Male staff	Before posters	ra	Over the counter	Yes			Neg	Yes	Sex partner	Very easy		Strongly agree		Strongly agree	Strongly agree	Strongly agree	for those who cant visit HTC sites will be able to buy and tset	Adults	Everyone
1	1	1	1		1	25-35 years	Female	both swa and eng	hivtst	HST	HIV testing	hst	Self	Self		No		No	friend/ family member who heard about/participated in the study	No		No	>=4	within last 12 months	To understand illness or symptoms that I had	Private hospital/ clinic (including NGO, CBO and faith-based facilities)	Easily accessible	1	Afternoon	Male staff	Before posters	ra	Over the counter	Yes			Neg	Yes	Sex partner	Very easy		Strongly agree	it is easy to use	Strongly agree	Strongly agree	Agree	many people visit the phamacies	Everyone	Everyone
1	0	0	0	in a hurry/ to come later		18-24 years	Male		mal	Other products	Other products		Self	Self					friend/ family member who heard about/participated in the study									1	Evening	Male staff	Before posters
1	0	0	0	in a hurry/ to come later		25-35 years	Female		sti	Other products	Other products		Self	Self					friend/ family member who heard about/participated in the study									1	Evening	Male staff	Before posters
1	0	0	0	in a hurry/ to come later		18-24 years	Female		mal	Other products	Other products		Self	Self					friend/ family member who heard about/participated in the study									1	Evening	Female staff	Before posters
1	1	1	1		1	25-35 years	Female	both swa and eng	pgtst	Other products	Other products		Self	Self		No		No	friend/ family member who heard about/participated in the study	No		No	3	within last 12 months	Advice from doctor or health provider/ ANC invitation	Private hospital/ clinic (including NGO, CBO and faith-based facilities)	I didnt choose myself, I had gone for other services	1	Morning	Female staff	Before posters	ra	Over the counter				Neg	No		Very easy		Strongly agree	so that they can know their status	Strongly agree	Agree	Strongly agree	it is safe since drugs are being sold their	The youth	The youth
1	1	1	1		1	18-24 years	Female	both swa and eng	oc	Other products	Other products		Self	Self		No		No	friend/ family member who heard about/participated in the study	Yes	pregnancy	No	>=4	within last 12 months	Possible exposure to HIV	Private hospital/ clinic (including NGO, CBO and faith-based facilities)	Easily accessible	1	Afternoon	Female staff	Before posters	ra	Over the counter	No			Neg	Yes	Friend	Very easy		Strongly agree	an easier method of knowing his/her status	Strongly agree	Strongly agree	Strongly agree	everybody minds his/her business	The youth	The youth
1	0	0	0	declined		18-24 years	Female		epill	Other products	Other products		Self	Self					friend/ family member who heard about/participated in the study									1	Evening	Female staff	Before posters
1	0	0	0	declined		>35 years	Male		mal	Other products	Other products		Self	Self					friend/ family member who heard about/participated in the study									1	Afternoon	Female staff	Before posters
1	0	0	0	in a hurry/ to come later		18-24 years	Female		epill	Other products	Other products		Self	Self					friend/ family member who heard about/participated in the study									1	Evening	Female staff	Before posters
1	1	1	1		1	>35 years	Male	both swa and eng	hivtst	Other HIV test	HIV testing		Self	Self		No		No	friend/ family member who heard about/participated in the study	No		Yes	>=4	within last 12 months	To understand illness or symptoms that I had	Government hospital/ clinic	Easily accessible	1	Evening	Female staff	Before posters	ra	In-pharmacy test	No			Neg	No		Very easy		Strongly agree	an easy way of knowing their status	Strongly agree	Strongly agree	Strongly agree		Everyone	Everyone
1	0	0	0	in a hurry/ to come later		25-35 years	Male		sti	Other products	Other products		Self	Self					friend/ family member who heard about/participated in the study									1	Evening	Male staff	Before posters
1	1	0	0	no money		25-35 years	Female	both swa and eng	epill	Other products	Other products		Self	Self					friend/ family member who heard about/participated in the study									1	Morning	Female staff	Before posters	ra
1	1	1	1		1	>35 years	Male	both swa and eng	hivtst	Other HIV test	HIV testing		Self	Self		No		No	friend/ family member who heard about/participated in the study	No		Yes	>=4	within last 12 months	Possible exposure to HIV	Government hospital/ clinic	Easily accessible	1	Morning	Female staff	Before posters	ra	Over the counter	No		RA2: client requested to re-test at least thrice using the kit as he thinks its the best kit to use	Neg	Yes	Sex partner	Very easy		Strongly agree		Strongly agree	Strongly agree	Strongly agree	people will be able to come out in big numbers to use the kit	Everyone	Everyone
1	0	0	0	declined		>35 years	Female		oc	Other products	Other products		Self	Self					friend/ family member who heard about/participated in the study									1	Afternoon	Female staff	Before posters
1	1	1	1		1	18-24 years	Male	both swa and eng	hivtst	HST	HIV testing	hst	Self	Self		No		Yes	friend/ family member who heard about/participated in the study	No		Yes	>=4	earlier than 12 months ago	Encouraged by sex partner	Government hospital/ clinic	Easily accessible	1	Morning	Female staff	Before posters	ra	Over the counter	No			Neg	No		Very easy		Strongly agree	anyone can get the virus	Strongly agree	Strongly agree	Strongly agree	its a place where most people trust	Other	Everyone
1	1	1	1		1	18-24 years	Male	both swa and eng	hivtst	HST	HIV testing	hst	Self	Self		No		No	friend/ family member who heard about/participated in the study	No		No	1	earlier than 12 months ago	Possible exposure to HIV	Government hospital/ clinic	Easily accessible	1	Morning	Female staff	Before posters	ra	In-pharmacy test			RA2: client asked for STI treatment and was reffered to Kemri Mtwapa and asked to come for retest after one month	Neg	No		Very easy		Agree	someone knowing his status is not bad	Strongly agree	Strongly agree	Strongly agree	no queing	The youth	The youth
1	1	0	0	not ready		>35 years	Male	both swa and eng	mal	Other products	Other products		Self	Self					friend/ family member who heard about/participated in the study									1	Morning	Female staff	Before posters	ra
1	1	1	0	wanted a blood test		>35 years	Male	both swa and eng	hivtst	Other HIV test	HIV testing		Self	Self		Yes	khb	No	friend/ family member who heard about/participated in the study	No		Yes	>=4	within last 12 months	Possible exposure to HIV	Government hospital/ clinic	Easily accessible	1	Evening	Female staff	Before posters	ra										Strongly agree	good reason to know your status		Undecided			Married couples
1	1	1	1		1	25-35 years	Female	both swa and eng	hivtst	Other HIV test	HIV testing		Self	Self		Yes	khb	No	friend/ family member who heard about/participated in the study	Yes	pregnancy	Yes	>=4	within last 12 months	To understand illness or symptoms that I had	self-testing	Confidential/ private/ discreet	1	Afternoon	Male staff	Before posters	ra	Over the counter				Neg	Yes	Friend	Very easy		Agree	people dont want to go to hospitals	Strongly agree	Strongly agree	Agree	easily accesable	Married couples	Married couples
1	1	1	1		1	>35 years	Male	both swa and eng	hivtst	HST	HIV testing	hst	Self	Self		Yes	unknown	No	friend/ family member who heard about/participated in the study	No		No	2	within last 12 months	To understand illness or symptoms that I had	Government hospital/ clinic	Easily accessible	1	Evening	Male staff	Before posters	ra	Over the counter	Yes			Neg	Yes	Friend	Very easy		Strongly agree	everybody to know her status	Agree	Strongly agree	Agree		Everyone	Everyone
1	1	1	1		1	25-35 years	Female	both swa and eng	hivtst	HST	HIV testing	hst	Self	Self		No		No	friend/ family member who heard about/participated in the study	No		No	>=4	within last 12 months	Encouraged by friend or family member	Mobile testing service	Easily accessible	1	Evening	Male staff	Before posters	ra	Over the counter	Yes			Neg	No		Easy		Strongly agree	people know their status	Agree	Agree	Agree		Everyone	Everyone
1	1	1	1		1	>35 years	Male	both swa and eng	hivtst	HST	HIV testing	hst	Self	Self		No		No	friend/ family member who heard about/participated in the study	No		Yes	>=4	within last 12 months	To understand illness or symptoms that I had	Private hospital/ clinic (including NGO, CBO and faith-based facilities)	Easily accessible	1	Evening	Male staff	Before posters	ra	Over the counter	Yes			Neg	No		Very easy		Strongly agree	so that to know those who are sick and those who ar not	Strongly agree	Strongly agree	Strongly agree	people can buy them easily	Married couples	Everyone
1	1	1	1		1	25-35 years	Female	both swa and eng	hivtst	HST	HIV testing	hst	Self	Self		Yes	determine	No	friend/ family member who heard about/participated in the study	No		No	>=4	within last 12 months	Advice from doctor or health provider/ ANC invitation	Government hospital/ clinic	Easily accessible	1	Evening	Female staff	Before posters	ra	Over the counter	Yes			Neg	No		Very easy		Strongly agree	so that they can know their status	Strongly agree	Agree	Strongly agree	it will be easy for those who fear going to the VCT's	Adults	Adults
1	1	1	1		1	>35 years	Male	both swa and eng	hivtst	HST	HIV testing	hst	Self	Self		Yes	determine	No	friend/ family member who heard about/participated in the study	No		No	>=4	within last 12 months	To understand illness or symptoms that I had	self-testing	Easily accessible	1	Night	Female staff	After posters	ra	Over the counter	No			Neg	Yes	Sex partner	Very easy		Strongly agree	so that people can know their status	Strongly agree	Strongly agree	Agree		Everyone	Everyone
1	1	1	1		1	>35 years	Male	both swa and eng	hivtst	HST	HIV testing	hst	Self	Self		No		No	friend/ family member who heard about/participated in the study	No		Yes	>=4	earlier than 12 months ago	To understand illness or symptoms that I had	Private hospital/ clinic (including NGO, CBO and faith-based facilities)	Easily accessible	1	Afternoon	Male staff	After posters	ra	Over the counter	No			Neg	No		Easy		Strongly agree	for those who are not able to go to VCT it will be easy for them to know their status	Strongly agree	Agree	Strongly agree	because for those who cant visit HTC sites will be able to know their status by using those test kit	Everyone	Everyone
1	0	0	0	declined		>35 years	Male		condoms	Other products	Other products		Self	Self					friend/ family member who heard about/participated in the study									4	Evening	Male staff	Before posters
1	1	1	1		1	25-35 years	Female	both swa and eng	hivtst	Other HIV test	HIV testing		Self	Self		Yes	khb	No	friend/ family member who heard about/participated in the study	Yes	pregnancy	Yes	>=4	within last 12 months	To plan the future/ getting married/ take charge over one's health	Mobile testing service	I didnt choose myself, I had gone for other services	4	Night	Male staff	Before posters	ra	Over the counter	Yes			Neg	Yes	Sex partner	Very easy		Strongly agree	for those people who dont get time	Strongly agree	Strongly agree	Strongly agree	easily accessable	Everyone	Everyone
1	1	1	1		1	25-35 years	Male	both swa and eng	hivtst	Other HIV test	HIV testing		Self	Self		No		No	friend/ family member who heard about/participated in the study	No		Yes	>=4	within last 12 months	Curiosity	Government hospital/ clinic	Easily accessible	4	Night	Male staff	Before posters	ra	Over the counter	Yes			Neg	Yes	Sex partner	Very easy		Strongly agree	alot of people fear to go for testing so its a good method of testing	Strongly agree	Strongly agree	Strongly agree	convinient and affordable	Other	Everyone
1	1	1	1		1	25-35 years	Female	both swa and eng	hivtst	Other HIV test	HIV testing		Self	Self		No		No	friend/ family member who heard about/participated in the study	Yes	pregnancy	Yes	1	within last 12 months	Employment/ travel/ donating blood	Government hospital/ clinic	I didnt choose myself, I had gone for other services	4	Evening	Male staff	Before posters	ra	In-pharmacy test	No			Neg	No		Very easy		Strongly agree	it is a good initiative and confidential	Strongly agree	Strongly agree	Strongly agree		Married couples	Married couples
1	1	1	1		1	18-24 years	Female	both swa and eng	epill	Other products	Other products		Self	Self		Yes	some blood test	Yes	friend/ family member who heard about/participated in the study	No		Yes	3	within last 12 months	Encouraged by friend or family member	VCT/ HTC center	Easily accessible	4	Night	Male staff	Before posters	psp	Over the counter	No			Neg	No		Very easy		Strongly agree	for people to know their status	Strongly agree	Strongly agree	Strongly agree		Everyone	Everyone
1	1	1	0	no money		18-24 years	Female	both swa and eng	hivtst	Other HIV test	HIV testing		Self	Self		No		No	friend/ family member who heard about/participated in the study	No		Yes	3	within last 12 months	Employment/ travel/ donating blood	Government hospital/ clinic	I didnt choose myself, I had gone for other services	4	Afternoon	Male staff	Before posters	ra										Strongly agree	so that everyone knows their status		Strongly agree			Everyone
1	0	0	0	in a hurry/ to come later		18-24 years	Female		pgtst	Other products	Other products		Self	Self					friend/ family member who heard about/participated in the study									4	Evening	Male staff	Before posters
1	0	0	0	declined		25-35 years	Female		pgtst	Other products	Other products		Self	Self					friend/ family member who heard about/participated in the study									4	Evening	Male staff	Before posters
1	0	0	0	declined		>35 years	Male		condoms	Other products	Other products		Self	Self					friend/ family member who heard about/participated in the study									4	Night	Male staff	Before posters
1	0	0	0	wanted a blood test		25-35 years	Male		hivtst	Other HIV test	HIV testing		Self	Self					friend/ family member who heard about/participated in the study									4	Night	Male staff	Before posters
1	0	0	0	in a hurry/ to come later		18-24 years	Female		epill	Other products	Other products		Self	Self					friend/ family member who heard about/participated in the study									4	Night	Male staff	Before posters
1	1	0	0	not ready		25-35 years	Male	both swa and eng	epill	Other products	Other products		Other	Partner					friend/ family member who heard about/participated in the study									4	Evening	Male staff	Before posters	ra
1	0	0	0	declined		>35 years	Male		epill	Other products	Other products		Self	Self					friend/ family member who heard about/participated in the study									4	Evening	Male staff	Before posters
1	0	0	0	declined		25-35 years	Male		condoms	Other products	Other products		Self	Self					friend/ family member who heard about/participated in the study									4	Evening	Male staff	Before posters
1	0	0	0	declined		18-24 years	Female		epill	Other products	Other products		Self	Self					friend/ family member who heard about/participated in the study									4	Night	Male staff	Before posters
1	0	0	0	declined		>35 years	Male		perform	Other products	Other products		Self	Self					friend/ family member who heard about/participated in the study									4	Night	Male staff	Before posters
1	0	0	0	declined		25-35 years	Male		condoms	Other products	Other products		Self	Self					friend/ family member who heard about/participated in the study									4	Night	Male staff	Before posters
1	0	0	0	declined		25-35 years	Female		pgtst	Other products	Other products		Self	Self					friend/ family member who heard about/participated in the study									4	Night	Male staff	Before posters
1	0	0	0	declined		18-24 years	Female		pgtst	Other products	Other products		Self	Self					friend/ family member who heard about/participated in the study									4	Night	Male staff	Before posters
1	0	0	0	declined		>35 years	Male		condoms	Other products	Other products		Self	Self					friend/ family member who heard about/participated in the study									4	Night	Male staff	Before posters
1	0	0	0	declined		>35 years	Male		other	Other products	Other products	lubricants	Self	Self					friend/ family member who heard about/participated in the study									4	Night	Male staff	Before posters
1	1	1	1		1	25-35 years	Male	both swa and eng	hivtst	HST	HIV testing	hst	Self	Self		No		No	friend/ family member who heard about/participated in the study	Yes	diabetes	No	1	earlier than 12 months ago	Curiosity	Mobile testing service	Easily accessible	4	Evening	Male staff	Before posters	psp	Over the counter	No			Neg	No		Easy		Strongly agree	well it is easy for people to know their status	Strongly agree	Strongly agree	Strongly agree	accessable	Sexually active	Sexually active
1	0	0	0	declined		25-35 years	Male		condoms	Other products	Other products		Self	Self					friend/ family member who heard about/participated in the study									4	Evening	Male staff	Before posters
1	0	0	0	declined		25-35 years	Female		pgtst	Other products	Other products		Self	Self					friend/ family member who heard about/participated in the study									4	Evening	Male staff	Before posters
1	0	0	0	declined		25-35 years	Female		epill	Other products	Other products		Self	Self					friend/ family member who heard about/participated in the study									4	Evening	Male staff	Before posters
1	0	0	0	declined		>35 years	Male		condoms	Other products	Other products		Self	Self					friend/ family member who heard about/participated in the study									4	Evening	Male staff	Before posters
1	1	1	1		0	>35 years	Male	both swa and eng	hivtst	HST	HIV testing	hst	Self	Self		No		No	friend/ family member who heard about/participated in the study	No		No	2	within last 12 months	Encouraged by friend or family member	self-testing	Easily accessible	4	Evening	Male staff	Before posters	psp	Over the counter		did not test	RA2: client claims the partner threw away the test kit before testing and they went to a private health facility and tested as a couple. client was impatient and did not answer some questions.						Agree			Agree			Everyone
1	0	0	0	declined		18-24 years	Female		epill	Other products	Other products		Self	Self					friend/ family member who heard about/participated in the study									4	Night	Male staff	Before posters
1	0	0	0	declined		18-24 years	Female		pgtst	Other products	Other products		Self	Self					friend/ family member who heard about/participated in the study									4	Night	Male staff	Before posters
1	0	0	0	declined		25-35 years	Female		pgtst	Other products	Other products		Self	Self					friend/ family member who heard about/participated in the study									4	Night	Male staff	Before posters
1	0	0	0	declined		25-35 years	Female		sti	Other products	Other products		Self	Self					friend/ family member who heard about/participated in the study									5	Afternoon	Female staff	Before posters
1	0	0	0	in a hurry/ to come later		18-24 years	Female		perform	Other products	Other products		Self	Self					friend/ family member who heard about/participated in the study									5	Night	Female staff	Before posters
1	1	1	1		1	18-24 years	Male	both swa and eng	hivtst	HST	HIV testing	hst	Self	Self				Yes	friend/ family member who heard about/participated in the study	Yes	malaria		0	never				5	Afternoon	Female staff	Before posters	ra	Over the counter	No			Neg	Yes	Friend	Very easy		Agree	people should be aware of their status	Strongly agree	Agree	Strongly agree	easy acces no much time consumed	The youth	The youth
1	1	1	1		1	25-35 years	Female	both swa and eng	hivtst	HST	HIV testing	hst	Self	Self		No		Yes	friend/ family member who heard about/participated in the study	Yes	malaria	Yes	>=4	earlier than 12 months ago	Advice from doctor or health provider/ ANC invitation	VCT/ HTC center	Easily accessible	5	Afternoon	Female staff	Before posters	ra	Over the counter	No			Neg	Yes	Sex partner	Very easy		Strongly agree	it is important to test for the HIV negative people to value their status and the HIV positive ones to seek teatment and live positively and happy	Strongly agree	Agree	Agree	its easy to access a phamacy and privacy is observed	Sexually active	Everyone
1	0	0	0	declined		25-35 years	Female		epill	Other products	Other products		Self	Self					friend/ family member who heard about/participated in the study									5	Morning	Female staff	Before posters
1	0	0	0	declined		>35 years	Female		oc	Other products	Other products		Self	Self					friend/ family member who heard about/participated in the study									5	Morning	Female staff	Before posters
1	0	0	0	declined		25-35 years	Female		epill	Other products	Other products		Self	Self					friend/ family member who heard about/participated in the study									5	Morning	Female staff	Before posters
1	1	1	1		1	18-24 years	Female	both swa and eng	epill	Other products	Other products		Self	Self		No		No	friend/ family member who heard about/participated in the study	Yes	malaria	Yes	>=4	within last 12 months	To understand illness or symptoms that I had	Private hospital/ clinic (including NGO, CBO and faith-based facilities)	Presence of skilled staff/ quality services/ information/ support	5	Evening	Female staff	Before posters	ra	Over the counter	No			Neg	Yes	Sex partner	Easy		Strongly agree	its confidential and guess it is easy	Strongly agree	Strongly agree	Strongly agree	very easy and good because phamacies are many	The youth	The youth
1	1	0	0	in a hurry/ to come later		25-35 years	Male	both swa and eng	pgtst	Other products	Other products		Other	Partner					friend/ family member who heard about/participated in the study									5	Evening	Female staff	Before posters	ra
1	1	1	1		1	25-35 years	Female	both swa and eng	hivtst	Other HIV test	HIV testing		Self	Self		No		No	friend/ family member who heard about/participated in the study	Yes	pregnancy	Yes	3	earlier than 12 months ago	Possible exposure to HIV	Private hospital/ clinic (including NGO, CBO and faith-based facilities)	Confidential/ private/ discreet	5	Afternoon	Female staff	Before posters	psp	In-pharmacy test	Yes			Neg	Yes	Sex partner	Very easy		Strongly agree	HIV is attracted through different means and this awarenes comes in handy in order to take charge over ones life	Strongly agree	Agree	Strongly agree		The youth
1	1	1	1		1	25-35 years	Male	both swa and eng	hivtst	Other HIV test	HIV testing		Self	Self		No		No	friend/ family member who heard about/participated in the study	No		Yes	>=4	earlier than 12 months ago	Encouraged by sex partner	VCT/ HTC center	Easily accessible	5	Afternoon	Female staff	Before posters	psp	In-pharmacy test	Yes			Neg	Yes	Sex partner	Very easy		Strongly agree	HIV is on the rise and people should take charge of their lives	Strongly agree	Agree	Strongly agree		The youth
1	1	0	0	no money		25-35 years	Male	both swa and eng	perform	Other products	Other products		Self	Self					friend/ family member who heard about/participated in the study									5	Morning	Female staff	Before posters	ra
1	0	0	0	in a hurry/ to come later		18-24 years	Female		pgtst	Other products	Other products		Self	Self					friend/ family member who heard about/participated in the study									5	Morning	Female staff	Before posters
1	0	0	0	in a hurry/ to come later		25-35 years	Female		pgtst	Other products	Other products		Self	Self					friend/ family member who heard about/participated in the study									5	Morning	Female staff	Before posters
1	0	0	0	in a hurry/ to come later		25-35 years	Male		sti	Other products	Other products		Self	Self					friend/ family member who heard about/participated in the study									5	Evening	Female staff	Before posters
1	0	0	0	in a hurry/ to come later		25-35 years	Female		mal	Other products	Other products		Self	Self					friend/ family member who heard about/participated in the study									5	Afternoon	Female staff	Before posters
1	0	0	0	in a hurry/ to come later		25-35 years	Male		perform	Other products	Other products		Self	Self					friend/ family member who heard about/participated in the study									5	Evening	Female staff	Before posters
1	1	1	1		1	25-35 years	Male	both swa and eng	hivtst	HST	HIV testing	hst	Self	Self		Yes	determine	No	friend/ family member who heard about/participated in the study	No		Yes	>=4	within last 12 months	To plan the future/ getting married/ take charge over one's health	Mobile testing service	I didnt choose myself, I had gone for other services	5	Evening	Female staff	After posters	ra	Over the counter	No		RA2: tested on 23/3/2016	Neg	Yes	Sex partner	Very easy		Strongly agree	people need to know their status	Strongly agree	Strongly agree	Strongly agree	easily accesiblle	Adults	Everyone
1	0	0	0	wanted a blood test		18-24 years	Female		hivtst	Other HIV test	HIV testing		Self	Self					friend/ family member who heard about/participated in the study									5	Evening	Female staff	After posters
1	0	0	0	declined		>35 years	Male		mal	Other products	Other products		Self	Self					friend/ family member who heard about/participated in the study									5	Evening	Female staff	After posters
1	1	1	1		1	18-24 years	Female	both swa and eng	hivtst	HST	HIV testing	rat poison	Self	Self		No		No	friend/ family member who heard about/participated in the study	No		No	>=4	earlier than 12 months ago	To plan the future/ getting married/ take charge over one's health	Private hospital/ clinic (including NGO, CBO and faith-based facilities)	Easily accessible	5	Afternoon	Male staff	After posters	ra	In-pharmacy test	No			Neg	No		Very easy		Strongly agree		Strongly agree	Strongly agree	Strongly agree	they are many everywhere	The youth	The youth
1	0	0	0	in a hurry/ to come later		25-35 years	Female		epill	Other products	Other products		Self	Self					friend/ family member who heard about/participated in the study									5	Evening	Female staff	After posters
1	0	0	0	in a hurry/ to come later		25-35 years	Female		oc	Other products	Other products		Self	Self					friend/ family member who heard about/participated in the study									5	Afternoon	Female staff	After posters
1	1	1	1		1	18-24 years	Female	both swa and eng	hivtst	Other HIV test	HIV testing		Self	Self		No		No	friend/ family member who heard about/participated in the study	Yes	pregnancy	Yes	2	earlier than 12 months ago	To plan the future/ getting married/ take charge over one's health	Private hospital/ clinic (including NGO, CBO and faith-based facilities)	Easily accessible	5	Evening	Female staff	After posters	ra	Over the counter	No			Neg	Yes	Sex partner	Very easy		Undecided	because i have not used them yet	Strongly agree	Strongly agree	Strongly agree	no need to go to these places like Kemri because they close early but phamacies open up to late hours	The youth	Everyone
1	0	0	0	in a hurry/ to come later		25-35 years	Female		oc	Other products	Other products		Self	Self					friend/ family member who heard about/participated in the study									5	Morning	Female staff	After posters
1	0	0	0	declined		>35 years	Male		perform	Other products	Other products		Self	Self					friend/ family member who heard about/participated in the study									5	Afternoon	Female staff	After posters
1	0	0	0	in a hurry/ to come later		25-35 years	Male		mal	Other products	Other products		Self	Self					friend/ family member who heard about/participated in the study									5	Afternoon	Female staff	After posters
1	0	0	0	declined		>35 years	Male		pgtst	Other products	Other products		Other	Partner					friend/ family member who heard about/participated in the study									5	Evening	Female staff	After posters
1	0	0	0	declined		>35 years	Male		condoms	Other products	Other products		Self	Self					friend/ family member who heard about/participated in the study									4	Night	Male staff	Before posters
1	0	0	0	declined		18-24 years	Female		epill	Other products	Other products		Self	Self					friend/ family member who heard about/participated in the study									4	Night	Male staff	Before posters
1	0	0	0	declined		25-35 years	Female		epill	Other products	Other products		Self	Self					friend/ family member who heard about/participated in the study									4	Night	Male staff	Before posters
1	0	0	0	declined		>35 years	Male		perform	Other products	Other products		Self	Self					friend/ family member who heard about/participated in the study									4	Night	Male staff	Before posters
1	0	0	0	declined		25-35 years	Male		condoms	Other products	Other products		Self	Self					friend/ family member who heard about/participated in the study									4	Night	Male staff	Before posters
1	1	1	1		1	18-24 years	Female	both swa and eng	epill	Other products	Other products		Self	Self		No		No	friend/ family member who heard about/participated in the study	No		No	3	within last 12 months	Advice from doctor or health provider/ ANC invitation	Private hospital/ clinic (including NGO, CBO and faith-based facilities)	I didnt choose myself, I had gone for other services	4	Morning	Male staff	Before posters	ra	Over the counter	No			Neg	No		Very easy		Agree	true it should be available to everyone	Strongly agree	Agree	Undecided	not everybody will know they are sold there	Everyone	Everyone
1	1	1	1		0	18-24 years	Female	both swa and eng	other	Other products	Other products	lubricants	Other	Partner		No		No	friend/ family member who heard about/participated in the study	Yes	pregnancy	Yes	1	earlier than 12 months ago	Encouraged by sex partner	Private hospital/ clinic (including NGO, CBO and faith-based facilities)	Confidential/ private/ discreet	4	Morning	Male staff	Before posters	psp	Over the counter		unreachable on phone	RA2: phone answered by a man. client may have changed number						Undecided	because i hadnt heard it before		Agree			Adults
1	0	0	0	declined		18-24 years	Female		oc	Other products	Other products		Self	Self					friend/ family member who heard about/participated in the study									4	Night	Male staff	Before posters
1	0	0	0	declined		25-35 years	Female		pgtst	Other products	Other products		Self	Self					friend/ family member who heard about/participated in the study									4	Night	Male staff	Before posters
1	1	1	1		1	18-24 years	Male	both swa and eng	hivtst	Other HIV test	HIV testing		Self	Self				No	friend/ family member who heard about/participated in the study	No			0	never				4	Night	Male staff	Before posters	ra	In-pharmacy test	No			Neg	Yes	Family member	Easy		Strongly agree	so that they test and know their status	Strongly agree	Strongly agree	Strongly agree	phamacies are every where	Everyone	Everyone
1	1	1	1		1	>35 years	Male	both swa and eng	hivtst	Other HIV test	HIV testing		Self	Self		No		No	friend/ family member who heard about/participated in the study	No		Yes	2	earlier than 12 months ago	To plan the future/ getting married/ take charge over one's health	Private hospital/ clinic (including NGO, CBO and faith-based facilities)	Confidential/ private/ discreet	4	Morning	Male staff	Before posters	psp	Over the counter			RA2: its not 100% reliable because it is written that it is not accurate when someone is on ARV's so people can use this to black mail someone to infect them	Neg	No		Very easy		Agree	so that people know their status	Strongly agree	Agree	Strongly agree		Other	Everyone
1	1	1	1		0	>35 years	Male	both swa and eng	hivtst	HST	HIV testing	hst	Self	Self		No		No	friend/ family member who heard about/participated in the study	No		No	2	within last 12 months	Advice from doctor or health provider/ ANC invitation	VCT/ HTC center	Easily accessible	4	Evening	Male staff	Before posters	psp	Over the counter		unreachable on phone	RA2: phone switched off or out of range						Strongly agree	for people to know their status		Strongly agree			The youth
1	1	1	1		1	>35 years	Female	both swa and eng	hivtst	Other HIV test	HIV testing		Self	Self		No		No	friend/ family member who heard about/participated in the study	Yes	pregnancy	No	3	earlier than 12 months ago	Advice from doctor or health provider/ ANC invitation	VCT/ HTC center		4	Afternoon	Male staff	After posters	psp	In-pharmacy test	No			Neg	Yes	Family member	Easy		Undecided		Strongly agree	Undecided	Strongly agree	very true	Everyone	Everyone
1	1	1	1		1	18-24 years	Female	both swa and eng	hivtst	HST	HIV testing	hst	Self	Self		Yes	unknown	No	friend/ family member who heard about/participated in the study	No		Yes	1	within last 12 months	To understand illness or symptoms that I had	VCT/ HTC center	Easily accessible	4	Morning	Male staff	After posters	psp	In-pharmacy test	No			Neg	Yes	Sex partner	Undecided		Strongly disagree	cause its a personal feeling	Strongly disagree		Undecided	because am not sure	Other	Other
1	1	1	1		1	25-35 years	Female	both swa and eng	hivtst	Other HIV test	HIV testing		Self	Self		No		No	friend/ family member who heard about/participated in the study	Yes	pregnancy	No	3	within last 12 months	Curiosity	Private hospital/ clinic (including NGO, CBO and faith-based facilities)	Confidential/ private/ discreet	4	Afternoon	Male staff	After posters	psp	In-pharmacy test	No			Neg	No		Very easy		Strongly agree	to know their status and make right choices	Strongly agree	Strongly agree	Strongly agree	accesability plus privacy	Everyone	Everyone
1	1	1	1		1	18-24 years	Male	both swa and eng	mal	Other products	Other products		Self	Self				No	friend/ family member who heard about/participated in the study	No			0	never				4	Afternoon	Male staff	After posters	psp	Over the counter	No		RA2: client was happy and advocated for test kits to be made available in every retail shop apart from phamacies	Neg	No		Easy		Agree	so that they can know their status	Strongly agree	Agree	Strongly agree	very convinient place	Everyone	Everyone
1	1	1	1		1	>35 years	Female	both swa and eng	hivtst	Other HIV test	HIV testing		Self	Self		Yes	unknown	No	friend/ family member who heard about/participated in the study	No		No	>=4	earlier than 12 months ago	Employment/ travel/ donating blood	Government hospital/ clinic	Confidential/ private/ discreet	4	Night	Male staff	After posters	psp	Over the counter	No		RA2: client opened up to be in a discordant relationship with the husband for 6 years and test was just a follow up but loved the test and said she would test again because it is painless and easy to use	Neg	Yes	Family member	Very easy		Agree		Strongly agree	Strongly agree	Strongly agree		The youth	Adults
1	1	1	1		0	25-35 years	Female	both swa and eng	hivtst	HST	HIV testing	hst	Self	Self		Yes	unknown	Yes	media or internet	No		Yes	3	within last 12 months	Advice from doctor or health provider/ ANC invitation	Government hospital/ clinic	I didnt choose myself, I had gone for other services	4	Night	Male staff	After posters	psp	Over the counter		unreachable on phone	RA2: number not in use						Strongly agree			Strongly agree
1	1	1	1		1	25-35 years	Female	both swa and eng	pgtst	Other products	Other products		Self	Self		Yes	khb	No	friend/ family member who heard about/participated in the study	No		No	1	earlier than 12 months ago	Advice from doctor or health provider/ ANC invitation	VCT/ HTC center	Easily accessible	4	Night	Male staff	After posters	psp	Over the counter	No			Neg	No		Very easy		Strongly agree	people can know their status	Strongly agree	Strongly agree	Agree		Everyone	Everyone
1	1	1	1		0	>35 years	Male	both swa and eng	hivtst	Other HIV test	HIV testing		Self	Self		No		No	friend/ family member who heard about/participated in the study	No		Yes	2	earlier than 12 months ago	To understand illness or symptoms that I had	Government hospital/ clinic	Easily accessible	4	Afternoon	Male staff	After posters	psp	Over the counter		unreachable on phone	RA2: client may have blocked RA's number						Agree	so that they know their status		Agree			Everyone
1	1	1	1		1	25-35 years	Female	both swa and eng	hivtst	HST	HIV testing	hst	Self	Self		Yes	unknown	No	friend/ family member who heard about/participated in the study	Yes	malaria	No	3	within last 12 months	Advice from doctor or health provider/ ANC invitation	Mobile testing service	Easily accessible	4	Afternoon	Male staff	After posters	psp	In-pharmacy test	No			Neg	Yes	Friend	Easy		Strongly agree	it will help build a persons confidence	Strongly agree	Agree	Agree		Adults	Adults
1	1	1	1		1	>35 years	Male	swa only	hivtst	Other HIV test	HIV testing		Self	Self		No		No	friend/ family member who heard about/participated in the study	No		Yes	2	within last 12 months	Encouraged by friend or family member	VCT/ HTC center	Easily accessible	4	Evening	Male staff	After posters	psp	Over the counter	Yes			Neg	Yes	Sex partner	Very easy		Strongly agree	most people will be encouraged to test	Strongly agree	Strongly agree	Strongly agree	easily accesable and people are afraid of VCT's	Everyone	Everyone
1	1	1	1		1	25-35 years	Female	both swa and eng	hivtst	Other HIV test	HIV testing		Self	Self		No		No	friend/ family member who heard about/participated in the study	No		Yes	1	earlier than 12 months ago	Encouraged by sex partner	VCT/ HTC center	Easily accessible	4	Evening	Male staff	After posters	psp	Over the counter	Yes			Neg	Yes	Sex partner	Very easy		Strongly agree		Strongly agree	Strongly agree	Strongly agree	easily accesable	Everyone	Married couples
1	1	1	1		1	18-24 years	Female	both swa and eng	pgtst	Other products	Other products		Self	Self		No		No	friend/ family member who heard about/participated in the study	Yes	pregnancy	No	1	within last 12 months	To understand illness or symptoms that I had	Government hospital/ clinic	Easily accessible	4	Morning	Male staff	After posters	ra	In-pharmacy test	No			Neg	No		Very easy		Strongly agree	easy to test oneself	Strongly agree	Strongly agree	Strongly agree		The youth	The youth
1	0	0	0	in a hurry/ to come later		25-35 years	Female		epill	Other products	Other products		Self	Self					friend/ family member who heard about/participated in the study									4	Afternoon	Male staff	After posters
1	1	1	1		1	25-35 years	Male	both swa and eng	hivtst	Other HIV test	HIV testing		Self	Self		Yes	unknown	No	friend/ family member who heard about/participated in the study	No		Yes	2	earlier than 12 months ago	Encouraged by sex partner	Mobile testing service	Easily accessible	4	Night	Male staff	After posters	psp	In-pharmacy test	No			Neg	No		Easy		Strongly agree	for people to know their status	Strongly agree	Agree	Agree		Everyone	Everyone
1	1	1	1		1	>35 years	Male	both swa and eng	hivtst	Other HIV test	HIV testing		Self	Self		No		No	friend/ family member who heard about/participated in the study	No		Yes	2	within last 12 months	Encouraged by friend or family member	Private hospital/ clinic (including NGO, CBO and faith-based facilities)	Easily accessible	4	Morning	Male staff	After posters	ra	In-pharmacy test	No			Neg	Yes	Sex partner	Very easy		Strongly agree	so that people can know their status	Strongly agree	Strongly agree	Strongly agree	they are everywhere	Everyone	Everyone
1	1	1	1		1	25-35 years	Male	both swa and eng	hivtst	Other HIV test	HIV testing		Self	Self		No		No	friend/ family member who heard about/participated in the study	No		No	2	within last 12 months	Employment/ travel/ donating blood	Government hospital/ clinic	I didnt choose myself, I had gone for other services	4	Afternoon	Male staff	After posters	ra	In-pharmacy test	No		RA2: the client was very excited after getting the results and got so distracted informing his wife over the phone, that he did not answer the open-ended questions	Neg	Yes	Sex partner	Very easy		Disagree	you might take it and wrongly use it	Disagree	Strongly disagree	Strongly agree		The youth	The youth
1	1	1	1		1	25-35 years	Male	both swa and eng	hivtst	HST	HIV testing	hst	Self	Self		No		No	friend/ family member who heard about/participated in the study	No		No	1	earlier than 12 months ago	To understand illness or symptoms that I had	Government hospital/ clinic	Easily accessible	4	Night	Male staff	After posters	ra	In-pharmacy test	No			Neg	No		Very easy		Agree	since its a national disaster it will be good for medication purposes	Strongly agree	Strongly agree	Strongly agree	most people prefer phamacies than hospitals	The youth	The youth
1	1	1	1		1	18-24 years	Female	both swa and eng	hivtst	Other HIV test	HIV testing		Self	Self		Yes	determine	No	friend/ family member who heard about/participated in the study	No		Yes	2	within last 12 months	To plan the future/ getting married/ take charge over one's health	self-testing	Confidential/ private/ discreet	4	Night	Male staff	After posters	psp	Over the counter	No			Neg	Yes		Very easy		Strongly agree	fear of going to vcts	Strongly agree	Strongly disagree	Strongly agree		Everyone	Everyone
1	0	0	0	declined		>35 years	Male		perform	Other products	Other products		Self	Self					friend/ family member who heard about/participated in the study									1	Afternoon	Female staff	After posters
1	1	1	1		0	>35 years	Male	both swa and eng	hivtst	Other HIV test	HIV testing		Self	Self		Yes	determine	No	friend/ family member who heard about/participated in the study	No		Yes	>=4	within last 12 months	Employment/ travel/ donating blood	Private hospital/ clinic (including NGO, CBO and faith-based facilities)	I didnt choose myself, I had gone for other services	1	Afternoon	Male staff	After posters	ra	Over the counter		did not test	RA2: client traveled and forgot kit at home						Strongly agree	its good for people to know their status so its ok if they are available to all		Strongly agree			Everyone
1	1	1	1		1	>35 years	Male	both swa and eng	hivtst	Other HIV test	HIV testing		Self	Self		No		No	friend/ family member who heard about/participated in the study	No		No	>=4	within last 12 months	To understand illness or symptoms that I had	Mobile testing service	Easily accessible	1	Evening	Female staff	After posters	ra	Over the counter	No			Neg	Yes	Sex partner	Very easy		Strongly agree	because it is right for everyone to know their status	Strongly agree	Agree	Strongly agree	it will be easy for those who cant go to the VCT to get tested	Everyone	Everyone
1	1	1	1		1	>35 years	Male	both swa and eng	hivtst	HST	HIV testing	hst	Self	Self		No		No	friend/ family member who heard about/participated in the study	No		Yes	>=4	within last 12 months	To understand illness or symptoms that I had	Mobile testing service	Easily accessible	1	Morning	Female staff	After posters	ra	In-pharmacy test	Yes			Neg	No		Very easy		Strongly agree	because it is easy to use	Agree	Agree	Agree		Everyone	Everyone
1	1	1	1		1	25-35 years	Female	both swa and eng	hivtst	HST	HIV testing	hst	Self	Self		No		No	friend/ family member who heard about/participated in the study	No		Yes	>=4	within last 12 months	Advice from doctor or health provider/ ANC invitation	Private hospital/ clinic (including NGO, CBO and faith-based facilities)	I didnt choose myself, I had gone for other services	1	Morning	Female staff	After posters	ra	In-pharmacy test	Yes			Neg	No		Easy		Agree		Agree	Agree	Agree		Everyone	Everyone
1	1	1	1		1	>35 years	Male	both swa and eng	hivtst	HST	HIV testing	hst	Self	Self		No		No	friend/ family member who heard about/participated in the study	No		No	>=4	earlier than 12 months ago	Advice from doctor or health provider/ ANC invitation	Government hospital/ clinic	I didnt choose myself, I had gone for other services	1	Afternoon	Male staff	After posters	ra	Over the counter	No			Neg	Yes	Sex partner	Very easy		Strongly agree	it will help people know their status	Agree	Strongly agree	Strongly agree	its easily accesable	The youth	The youth
1	1	1	1		1	>35 years	Male	both swa and eng	hivtst	Other HIV test	HIV testing		Self	Self		No		No	friend/ family member who heard about/participated in the study	No		No	>=4	earlier than 12 months ago	Advice from doctor or health provider/ ANC invitation	Private hospital/ clinic (including NGO, CBO and faith-based facilities)	I didnt choose myself, I had gone for other services	1	Morning	Female staff	After posters	ra	In-pharmacy test	No			Neg	No		Very easy		Strongly agree	so that people know their status	Strongly agree	Agree	Strongly agree	many people choose phamacies	Adults	Adults
1	1	1	1		1	25-35 years	Male	both swa and eng	mal	Other products	Other products		Self	Self		No		No	friend/ family member who heard about/participated in the study	No		Yes	3	earlier than 12 months ago	To understand illness or symptoms that I had	Government hospital/ clinic	Easily accessible	1	Morning	Female staff	After posters	ra	In-pharmacy test	Yes			Neg	No		Very easy		Agree	many people will get to know their status	Strongly agree	Agree	Agree		The youth	Everyone
1	1	1	1		1	18-24 years	Female	both swa and eng	hivtst	HST	HIV testing	hst	Self	Self		No		No	friend/ family member who heard about/participated in the study	Yes	pregnancy	Yes	>=4	within last 12 months	Advice from doctor or health provider/ ANC invitation	Private hospital/ clinic (including NGO, CBO and faith-based facilities)	I didnt choose myself, I had gone for other services	1	Morning	Male staff	After posters	ra	In-pharmacy test	Yes			Neg	No		Very easy		Strongly agree	people will get to know their status in an easy way	Strongly agree	Strongly agree	Strongly agree	many people visit the phamacies	Everyone	Everyone
1	0	0	0	in a hurry/ to come later		18-24 years	Female		epill	Other products	Other products		Self	Self					friend/ family member who heard about/participated in the study									1	Evening	Female staff	After posters
1	1	1	1		1	25-35 years	Male	both swa and eng	hivtst	Other HIV test	HIV testing		Self	Self		No		No	friend/ family member who heard about/participated in the study	No		Yes	>=4	within last 12 months	To understand illness or symptoms that I had	Mobile testing service	Easily accessible	1	Afternoon	Male staff	After posters	ra	In-pharmacy test	Yes		RA2: on post testing the client was insisting the kits should be made available to the general public then there should be a counselor or pharmacy trained staff trained on counseling because its not easy for a person to take his/her results if the p	Neg	No		Very easy		Strongly agree	thers no pricking	Strongly agree	Agree	Agree	its confidential	Everyone	Everyone
1	1	1	1		1	18-24 years	Female	both swa and eng	hivtst	HST	HIV testing	hst	Self	Self		Yes	khb	No	friend/ family member who heard about/participated in the study	Yes	pregnancy	Yes	>=4	earlier than 12 months ago	Encouraged by sex partner	Private hospital/ clinic (including NGO, CBO and faith-based facilities)	Easily accessible	1	Afternoon	Male staff	After posters	ra	In-pharmacy test	Yes			Neg	No		Very easy		Strongly agree	everybody	Strongly agree	Strongly disagree	Strongly agree	not everyone is able to visit VCT sites	Other	Everyone
1	1	1	1		1	>35 years	Female	both swa and eng	hivtst	HST	HIV testing	hst	Self	Self		No		No	friend/ family member who heard about/participated in the study	No		Yes	>=4	within last 12 months	To understand illness or symptoms that I had	Private hospital/ clinic (including NGO, CBO and faith-based facilities)	Easily accessible	1	Morning	Male staff	After posters	ra	In-pharmacy test	No			Neg	No		Very easy		Strongly agree	because theres no different with the other hiv test kit in interprating results	Strongly agree	Agree	Agree		Everyone	Adults
1	1	1	1		1	18-24 years	Female	both swa and eng	hivtst	Other HIV test	HIV testing		Self	Self		No		No	friend/ family member who heard about/participated in the study	No		No	>=4	within last 12 months	Possible exposure to HIV	Government hospital/ clinic	Easily accessible	1	Morning	Male staff	After posters	ra	Over the counter	No		RA2: the client got excited after using the test kit and she was requesting if she could get three test kits for her family members	Neg	Yes	Family member	Very easy		Agree	it will be helpfull for those who cannot reach vct sites	Agree	Strongly agree	Agree	for those who cant reach vct sites they will be able to buy the test kit	The youth	Everyone
1	1	1	1		1	>35 years	Female	both swa and eng	hivtst	Other HIV test	HIV testing		Self	Self		No		No	friend/ family member who heard about/participated in the study	No		Yes	>=4	within last 12 months	To understand illness or symptoms that I had	Private hospital/ clinic (including NGO, CBO and faith-based facilities)	Easily accessible	1	Afternoon	Male staff	After posters	ra	In-pharmacy test	No			Neg	No		Easy		Strongly agree	everybody will know their status	Agree	Agree	Agree		Adults	Everyone
1	1	1	1		1	25-35 years	Male	both swa and eng	hivtst	HST	HIV testing	hst	Self	Self		No		No	friend/ family member who heard about/participated in the study	No		Yes	>=4	within last 12 months	Advice from doctor or health provider/ ANC invitation	Government hospital/ clinic	I didnt choose myself, I had gone for other services	1	Afternoon	Male staff	After posters	ra	In-pharmacy test	Yes			Neg	No		Very easy		Strongly agree	its an easy way doesnt require a doctor	Strongly agree	Agree	Strongly agree	many people prefer chemists than hospitals	Everyone	Everyone
1	1	1	1		1	>35 years	Female	both swa and eng	hivtst	Other HIV test	HIV testing		Self	Self		No		No	friend/ family member who heard about/participated in the study	Yes	pregnancy	Yes	>=4	within last 12 months	To understand illness or symptoms that I had	Mobile testing service	Easily accessible	1	Afternoon	Male staff	After posters	ra	In-pharmacy test	No			Neg	No		Very easy		Undecided	because everyone has his own use	Undecided	Agree	Agree	its private	The youth	The youth
1	1	1	1		1	>35 years	Male	both swa and eng	hivtst	Other HIV test	HIV testing		Self	Self		No		No	friend/ family member who heard about/participated in the study	No		No	>=4	earlier than 12 months ago	Advice from doctor or health provider/ ANC invitation	Private hospital/ clinic (including NGO, CBO and faith-based facilities)	I didnt choose myself, I had gone for other services	1	Afternoon	Male staff	After posters	ra	In-pharmacy test	No			Neg	No		Easy		Agree	because someone can do it himself	Strongly agree	Agree	Strongly agree	because everyone lives his own life no investigating the other	Married couples	Married couples
1	1	1	1		1	>35 years	Male	both swa and eng	hivtst	Other HIV test	HIV testing		Self	Self		No		No	friend/ family member who heard about/participated in the study	No		Yes	>=4	within last 12 months	To understand illness or symptoms that I had	Private hospital/ clinic (including NGO, CBO and faith-based facilities)	Easily accessible	1	Afternoon	Female staff	After posters	ra	In-pharmacy test	No			Neg	No		Very easy		Strongly agree	it will be good if people know their status	Strongly agree	Agree	Agree	most people believe in phamacies	Everyone	Everyone
1	1	1	1		1	18-24 years	Female	both swa and eng	hivtst	Other HIV test	HIV testing		Self	Self		Yes	determine	No	friend/ family member who heard about/participated in the study	Yes	pregnancy	No	3	within last 12 months	Encouraged by sex partner	Private hospital/ clinic (including NGO, CBO and faith-based facilities)	Easily accessible	1	Afternoon	Female staff	After posters	ra	Over the counter	No			Neg	No		Easy		Strongly agree	no pricking	Strongly agree	Strongly agree	Strongly agree	people trust phamacies so mucy	The youth	Everyone
1	0	0	0	in a hurry/ to come later		18-24 years	Female		epill	Other products	Other products		Self	Self					friend/ family member who heard about/participated in the study									1	Morning	Female staff	After posters
1	1	1	1		1	25-35 years	Male	both swa and eng	hivtst	HST	HIV testing	hst	Self	Self				No	friend/ family member who heard about/participated in the study	No			0	never				1	Morning	Female staff	After posters	ra	In-pharmacy test	No			Neg	No		Very easy		Strongly agree	not painfull its the simplest	Strongly agree	Agree	Strongly agree		Adults	Everyone
1	1	1	1		1	18-24 years	Female	both swa and eng	hivtst	HST	HIV testing	hst	Self	Self		No		No	friend/ family member who heard about/participated in the study	No		No	>=4	within last 12 months	Advice from doctor or health provider/ ANC invitation	Government hospital/ clinic	I didnt choose myself, I had gone for other services	1	Afternoon	Female staff	After posters	ra	In-pharmacy test	Yes			Neg	Yes	Sex partner	Easy		Agree		Agree	Agree	Agree		The youth	The youth
1	1	1	1		1	18-24 years	Female	both swa and eng	epill	Other products	Other products		Self	Self		No		No	friend/ family member who heard about/participated in the study	No		No	>=4	within last 12 months	To understand illness or symptoms that I had	Private hospital/ clinic (including NGO, CBO and faith-based facilities)	Easily accessible	3	Afternoon	Male staff	After posters	ra	Over the counter	No			Neg	Yes	Family member	Easy		Strongly agree	many people will get to know their status	Agree	Strongly agree	Agree		The youth	The youth
1	1	1	1		1	>35 years	Male	both swa and eng	mal	Other products	Other products		Self	Self		No		No	friend/ family member who heard about/participated in the study	No		Yes	>=4	within last 12 months	To understand illness or symptoms that I had	Government hospital/ clinic	Easily accessible	3	Evening	Male staff	After posters	ra	Over the counter	No			Neg	Yes	Sex partner	Easy		Agree	it will help one manage his or her health	Strongly agree	Agree	Agree	people trust phamacies	Married couples	Married couples
1	0	0	0	in a hurry/ to come later		>35 years	Female		mal	Other products	Other products		Self	Self					friend/ family member who heard about/participated in the study									3	Evening	Male staff	After posters
1	0	0	0	in a hurry/ to come later		25-35 years	Female		epill	Other products	Other products		Self	Self					friend/ family member who heard about/participated in the study									3	Morning	Male staff	After posters
1	0	0	0	declined		>35 years	Female		condoms	Other products	Other products		Other	Partner					friend/ family member who heard about/participated in the study									3	Night	Male staff	After posters
1	0	0	0	in a hurry/ to come later		25-35 years	Male		epill	Other products	Other products		Other	Partner					friend/ family member who heard about/participated in the study									3	Evening	Male staff	After posters
1	0	0	0	in a hurry/ to come later		25-35 years	Female		epill	Other products	Other products		Self	Self					friend/ family member who heard about/participated in the study									3	Evening	Male staff	After posters
1	0	0	0	declined		25-35 years	Male		pgtst	Other products	Other products		Self	Self					friend/ family member who heard about/participated in the study									3	Morning	Male staff	After posters
1	0	0	0	in a hurry/ to come later		25-35 years	Female		mal	Other products	Other products		Other	Family member					friend/ family member who heard about/participated in the study									3	Afternoon	Male staff	After posters
1	1	1	1		1	18-24 years	Female	both swa and eng	other	Other products	Other products	pep	Self	Self		No		No	friend/ family member who heard about/participated in the study	No		No	>=4	within last 12 months	To understand illness or symptoms that I had	Government hospital/ clinic	Easily accessible	3	Evening	Male staff	After posters	ra	In-pharmacy test	No			Neg	No		Easy		Agree		Strongly agree	Agree	Agree		Married couples	Married couples
1	1	1	1		1	18-24 years	Female	both swa and eng	hivtst	HST	HIV testing	hst	Self	Self		No		No	friend/ family member who heard about/participated in the study	Yes	pregnancy	No	>=4	within last 12 months	To understand illness or symptoms that I had	Government hospital/ clinic	Easily accessible	4	Evening	Female staff	After posters	psp	Over the counter	No			Neg	Yes	Family member	Very easy		Strongly agree	so that we know who are infected and who are not	Agree	Disagree	Undecided		The youth	The youth
1	0	0	0	in a hurry/ to come later		>35 years	Male		hivtst	Other HIV test	HIV testing		Self	Self					friend/ family member who heard about/participated in the study									4	Evening	Male staff	After posters
1	0	0	0	in a hurry/ to come later		25-35 years	Female		hivtst	Other HIV test	HIV testing		Self	Self					friend/ family member who heard about/participated in the study									4	Evening	Male staff	After posters
1	1	1	1		1	25-35 years	Male	both swa and eng	hivtst	HST	HIV testing	hst	Self	Self		Yes	determine	No	friend/ family member who heard about/participated in the study	No		Yes	>=4	earlier than 12 months ago	Encouraged by sex partner	VCT/ HTC center	Presence of skilled staff/ quality services/ information/ support	4	Morning	Female staff	After posters	psp	Over the counter	No			Neg	Yes	Sex partner	Very easy		Agree	so that they can access kit and know their status	Strongly agree	Agree	Strongly agree	due to availability can be easily accessed	The youth	The youth
1	1	1	1		1	25-35 years	Female	both swa and eng	hivtst	Other HIV test	HIV testing		Self	Self		No		No	friend/ family member who heard about/participated in the study	Yes	pregnancy	Yes	>=4	within last 12 months	To understand illness or symptoms that I had	Private hospital/ clinic (including NGO, CBO and faith-based facilities)	Easily accessible	4	Evening	Female staff	After posters	psp	In-pharmacy test	Yes			Neg	Yes	Sex partner	Easy		Agree	its easy to use	Agree	Agree	Agree	most clients visit phamacies	Everyone
1	1	1	1		1	>35 years	Male	both swa and eng	hivtst	Other HIV test	HIV testing		Self	Self		No		No	friend/ family member who heard about/participated in the study	No		Yes	2	within last 12 months	Encouraged by friend or family member	Private hospital/ clinic (including NGO, CBO and faith-based facilities)	Confidential/ private/ discreet	5	Evening	Female staff	After posters	ra	Over the counter	No		RA2: client was very impressed with the test kits and recommended a otherpeople to come for the test	Neg	Yes	Sex partner	Very easy		Strongly agree		Strongly agree	Strongly agree	Strongly agree	dispensaries are challenging because every one knows you and would want to know the outcome	Sexually active	The youth
1	0	0	0	in a hurry/ to come later		>35 years	Male		perform	Other products	Other products		Self	Self					friend/ family member who heard about/participated in the study									5	Evening	Female staff	After posters
1	0	0	0	declined		25-35 years	Male		mal	Other products	Other products		Self	Self					friend/ family member who heard about/participated in the study									5	Evening	Female staff	After posters
1	0	0	0	declined		25-35 years	Male		perform	Other products	Other products		Self	Self					friend/ family member who heard about/participated in the study									5	Night	Female staff	After posters
1	0	0	0	in a hurry/ to come later		>35 years	Male		perform	Other products	Other products		Self	Self					friend/ family member who heard about/participated in the study									5	Night	Female staff	After posters
1	1	1	1		1	>35 years	Male	both swa and eng	hivtst	Other HIV test	HIV testing		Self	Self		No		No	friend/ family member who heard about/participated in the study	Yes	malaria	Yes	>=4	within last 12 months	Encouraged by friend or family member	Government hospital/ clinic	Confidential/ private/ discreet	5	Evening	Female staff	After posters	psp	In-pharmacy test	No			Neg	No		Very easy		Strongly agree	people should take charge over their health /life	Strongly agree	Strongly agree	Strongly agree	highly accesable	The youth	The youth
1	0	0	0	declined		>35 years	Male		condoms	Other products	Other products		Self	Self					friend/ family member who heard about/participated in the study									5	Morning	Female staff	After posters
1	0	0	0	in a hurry/ to come later		>35 years	Male		perform	Other products	Other products		Self	Self					friend/ family member who heard about/participated in the study									5	Night	Female staff	After posters
1	1	1	1		1	25-35 years	Female	both swa and eng	pgtst	Other products	Other products		Self	Self		No		No	friend/ family member who heard about/participated in the study	Yes	malaria	No	>=4	within last 12 months	To plan the future/ getting married/ take charge over one's health	VCT/ HTC center	I didnt choose myself, I had gone for other services	5	Afternoon	Female staff	After posters	psp	Over the counter	No			Neg	Yes	Family member	Very easy		Strongly agree	for people to take care of themselves	Strongly agree	Strongly agree	Strongly agree	because some people dont have time to go to hospitals to have the tests	Adults	Other
1	1	1	1		1	25-35 years	Male	both swa and eng	hivtst	HST	HIV testing	hst	Self	Self		Yes	determine	Yes	friend/ family member who heard about/participated in the study	No		Yes	>=4	within last 12 months	To understand illness or symptoms that I had	Private hospital/ clinic (including NGO, CBO and faith-based facilities)	Confidential/ private/ discreet	5	Night	Female staff	After posters	ra	Over the counter	Yes			Neg	Yes	Sex partner	Very easy		Agree	no pain involved	Strongly agree	Strongly agree	Strongly agree	i got good counseling and instructions	Adults	Everyone
1	0	0	0	wanted a blood test		25-35 years	Male		hivtst	Other HIV test	HIV testing		Self	Self					friend/ family member who heard about/participated in the study									5	Evening	Female staff	After posters
1	0	0	0	wanted a blood test		25-35 years	Female		hivtst	Other HIV test	HIV testing		Self	Self					friend/ family member who heard about/participated in the study									5	Evening	Female staff	After posters
1	1	0	0	in a hurry/ to come later		25-35 years	Male	both swa and eng	other	Other products	Other products	needles	Self	Self					friend/ family member who heard about/participated in the study									1	Afternoon	Female staff	Before posters	ra
1	1	1	1		1	25-35 years	Female	both swa and eng	epill	Other products	Other products		Self	Self		No		No	friend/ family member who heard about/participated in the study	No		No	>=4	within last 12 months	Encouraged by friend or family member	Mobile testing service	Easily accessible	1	Afternoon	Female staff	Before posters	ra	Over the counter				Neg	Yes	Friend	Easy		Agree		Agree	Agree	Agree	it is more private as one cannot know what a person is buying	Married couples	Married couples
1	1	0	0	in a hurry/ to come later		18-24 years	Female	both swa and eng	epill	Other products	Other products		Self	Self					friend/ family member who heard about/participated in the study									1	Afternoon	Male staff	Before posters	ra
1	1	0	0	in a hurry/ to come later		18-24 years	Female	both swa and eng	epill	Other products	Other products		Self	Self					friend/ family member who heard about/participated in the study									1	Evening	Male staff	Before posters	ra
1	1	1	1		1	18-24 years	Male	both swa and eng	hivtst	Other HIV test	HIV testing		Self	Self		No		No	friend/ family member who heard about/participated in the study	No		No	1	within last 12 months	To plan the future/ getting married/ take charge over one's health	Mobile testing service	Easily accessible	1	Afternoon	Male staff	Before posters	ra	Over the counter				Neg	No		Very easy		Strongly agree	because of confidentiality of results	Agree	Agree	Strongly agree	because it serves many people	The youth	The youth
1	1	1	1		1	18-24 years	Female	both swa and eng	pgtst	Other products	Other products		Self	Self		No		Yes	media or internet	Yes	pregnancy	No	2	within last 12 months	To plan the future/ getting married/ take charge over one's health	VCT/ HTC center	Confidential/ private/ discreet	1	Morning	Male staff	Before posters	ra	Over the counter				Neg	Yes	Sex partner	Easy		Strongly agree		Agree	Agree	Agree	since no one will know if somebody has come to ask for the kit	The youth	The youth
1	1	1	1		1	25-35 years	Male	both swa and eng	hivtst	Other HIV test	HIV testing		Self	Self		No		No	friend/ family member who heard about/participated in the study	No		Yes	3	within last 12 months	To plan the future/ getting married/ take charge over one's health	VCT/ HTC center	Confidential/ private/ discreet	1	Afternoon	Female staff	Before posters	ra	Over the counter	No			Neg	Yes	Friend	Very easy		Agree		Agree	Strongly agree	Agree		The youth	The youth
1	1	1	1		1	>35 years	Male	both swa and eng	oc	Other products	Other products		Other	Partner		No		No	friend/ family member who heard about/participated in the study	Yes	malaria	Yes	3	earlier than 12 months ago	To plan the future/ getting married/ take charge over one's health	VCT/ HTC center	Presence of skilled staff/ quality services/ information/ support	1	Morning	Male staff	Before posters	ra	Over the counter	No			Neg	Yes	Sex partner	Easy		Agree	business men and women do not get time to go to VCT/HTC sites	Agree	Strongly agree	Agree	can be easily accessed to		Everyone
1	1	1	0	kits not available		18-24 years	Female	swa only	pgtst	Other products	Other products		Self	Self		No		No	friend/ family member who heard about/participated in the study	No		No	1	within last 12 months	Advice from doctor or health provider/ ANC invitation	Government hospital/ clinic	Easily accessible	1	Afternoon	Male staff	Before posters	ra										Undecided	people may not be able to handle positive results		Agree			The youth
1	1	1	1		1	18-24 years	Male	both swa and eng	epill	Other products	Other products		Other	Partner		No		No	friend/ family member who heard about/participated in the study	No		No	3	earlier than 12 months ago	Encouraged by friend or family member	Mobile testing service	Easily accessible	1	Afternoon	Male staff	Before posters	ra	Over the counter				Neg	No		Very easy		Agree	its an easy way for people to know their status	Agree	Agree	Strongly agree	easy to get	The youth	The youth
1	1	1	1		1	25-35 years	Female	both swa and eng	hivtst	Other HIV test	HIV testing		Self	Self		No		No	friend/ family member who heard about/participated in the study	No		No	2	within last 12 months	Possible exposure to HIV	Government hospital/ clinic	Easily accessible	1	Afternoon	Male staff	Before posters	ra	Over the counter	No			Neg	Yes	Family member	Easy		Undecided		Agree	Agree	Strongly agree	easily available even on weekends	Adults	The youth
1	1	1	1		1	18-24 years	Male	both swa and eng	epill	Other products	Other products		Other	Partner		No		No	friend/ family member who heard about/participated in the study	No		No	3	within last 12 months	Encouraged by friend or family member	Mobile testing service	Easily accessible	1	Afternoon	Male staff	Before posters	ra	Over the counter	No			Neg	Yes	Family member	Easy		Agree		Agree	Strongly agree	Strongly agree	many people will be able to buy and test themselves	The youth	The youth
1	1	1	1		1	18-24 years	Female	swa only	oc	Other products	Other products		Self	Self		No		No	friend/ family member who heard about/participated in the study	Yes	pregnancy	No	2	earlier than 12 months ago	Advice from doctor or health provider/ ANC invitation	Government hospital/ clinic	Easily accessible	1	Morning	Male staff	Before posters	ra	Over the counter				Neg	Yes	Sex partner	Easy		Undecided	not sure how others will take their results	Agree	Agree	Agree	many people will get these test kits	Everyone	The youth
1	1	1	1		1	25-35 years	Male	swa only	hivtst	Other HIV test	HIV testing		Self	Self		No		No	friend/ family member who heard about/participated in the study	Yes	malaria	Yes	>=4	within last 12 months	Possible exposure to HIV	Mobile testing service	Easily accessible	1	Morning	Male staff	Before posters	ra	Over the counter	No			Neg	Yes	Family member	Easy		Agree	anyone who is 18yeras and above	Strongly agree	Agree	Strongly agree	many people will buy and test themselves	Adults	The youth
1	1	0	0	very sick		25-35 years	Male	both swa and eng	mal	Other products	Other products		Self	Self					friend/ family member who heard about/participated in the study									1	Evening	Male staff	Before posters	ra
1	0	0	0	declined		18-24 years	Female		pgtst	Other products	Other products		Self	Self					friend/ family member who heard about/participated in the study									1	Afternoon	Male staff	Before posters
1	1	0	0	in a hurry/ to come later		25-35 years	Female	both swa and eng	sti	Other products	Other products		Self	Self					friend/ family member who heard about/participated in the study									1	Afternoon	Male staff	Before posters	ra
1	1	1	1		1	25-35 years	Male	swa only	hivtst	HST	HIV testing	hst	Self	Self		No		No	friend/ family member who heard about/participated in the study	No		No	2	within last 12 months	To understand illness or symptoms that I had	Mobile testing service	Easily accessible	1	Afternoon	Male staff	Before posters	ra	Over the counter	No			Neg	Yes	Sex partner	Easy		Strongly agree	those who cannot go to the vct sites will beable to know their status	Strongly agree	Agree	Strongly agree		The youth	The youth
1	1	0	0	very sick		25-35 years	Female	both swa and eng	mal	Other products	Other products		Self	Self					friend/ family member who heard about/participated in the study									1	Afternoon	Male staff	Before posters	ra
1	1	1	1		1	18-24 years	Female	both swa and eng	sti	Other products	Other products		Self	Self		No		No	friend/ family member who heard about/participated in the study	No		No	1	within last 12 months	To plan the future/ getting married/ take charge over one's health	VCT/ HTC center	Easily accessible	1	Evening	Male staff	Before posters	ra	Over the counter	No			Neg	No		Easy		Agree		Agree	Agree	Strongly agree	easily available	The youth	The youth
1	1	1	1		1	18-24 years	Female	both swa and eng	hivtst	Other HIV test	HIV testing		Self	Self		No		No	friend/ family member who heard about/participated in the study	No		No	>=4	within last 12 months	Possible exposure to HIV	Mobile testing service	Easily accessible	1	Afternoon	Female staff	Before posters	ra	Over the counter	No			Neg	Yes	Family member	Very easy		Agree		Strongly agree	Agree	Strongly agree	one does not need to make a que to get the test	Everyone	Married couples
1	1	1	0	kits not available		18-24 years	Female	both swa and eng	pgtst	Other products	Other products		Self	Self		No		No	friend/ family member who heard about/participated in the study	Yes	pregnancy	No	2	earlier than 12 months ago	Advice from doctor or health provider/ ANC invitation	Private hospital/ clinic (including NGO, CBO and faith-based facilities)	Presence of skilled staff/ quality services/ information/ support	1	Afternoon	Female staff	Before posters	ra										Agree			Agree			Adults
1	0	0	0	in a hurry/ to come later		>35 years	Female		pgtst	Other products	Other products		Self	Self					friend/ family member who heard about/participated in the study									1	Afternoon	Male staff	Before posters
1	0	0	0	in a hurry/ to come later		25-35 years	Female		pgtst	Other products	Other products		Self	Self					friend/ family member who heard about/participated in the study									2	Afternoon	Female staff	Before posters
1	0	0	0	in a hurry/ to come later		25-35 years	Female		mal	Other products	Other products		Self	Self					friend/ family member who heard about/participated in the study									2	Afternoon	Female staff	Before posters
1	0	0	0	in a hurry/ to come later		>35 years	Male		perform	Other products	Other products		Self	Self					friend/ family member who heard about/participated in the study									2	Morning	Female staff	Before posters
1	0	0	0	declined		>35 years	Male		pgtst	Other products	Other products		Other	Partner					friend/ family member who heard about/participated in the study									2	Morning	Female staff	Before posters
1	1	1	1		1	>35 years	Male	both swa and eng	perform	Other products	Other products		Self	Self		No		No	friend/ family member who heard about/participated in the study	No		Yes	3	earlier than 12 months ago	Employment/ travel/ donating blood	Private hospital/ clinic (including NGO, CBO and faith-based facilities)	Easily accessible	2	Morning	Female staff	Before posters	ra	Over the counter	No			Neg	No		Very easy		Strongly agree		Strongly agree	Strongly agree	Strongly agree	because they are easily accesable	Adults	Other
1	1	1	1		1	25-35 years	Male	both swa and eng	hivtst	Other HIV test	HIV testing		Self	Self		No		No	friend/ family member who heard about/participated in the study	No		Yes	1	earlier than 12 months ago	Encouraged by sex partner	Government hospital/ clinic	Easily accessible	2	Afternoon	Female staff	Before posters	ra	Over the counter	No			Neg	Yes	Friend	Very easy		Agree	it is good if they are available so that people can be helped	Strongly agree	Strongly agree	Agree	it is easily accessable		Sexually active
1	1	1	1		1	25-35 years	Female	both swa and eng	hivtst	HST	HIV testing	uti infection, hst	Self	Self		Yes	khb	No	friend/ family member who heard about/participated in the study	Yes	pregnancy	Yes	>=4	within last 12 months	To plan the future/ getting married/ take charge over one's health	Private hospital/ clinic (including NGO, CBO and faith-based facilities)	Easily accessible	2	Afternoon	Female staff	Before posters	ra	In-pharmacy test	No		RA2: after the test the client called his husband for HST and the husband came and was enrolled and tested onsite	Neg	Yes	Family member	Very easy		Strongly agree		Strongly agree	Undecided	Agree			Everyone
1	1	1	1		1	25-35 years	Male	both swa and eng	hivtst	Other HIV test	HIV testing		Self	Self				No	friend/ family member who heard about/participated in the study	No			0	never				2	Afternoon	Female staff	Before posters	ra	Over the counter				Neg	Yes	Family member	Very easy		Strongly agree	knowing your status is very important	Strongly agree	Strongly agree	Strongly agree	easily accesable		Everyone
1	1	1	0	kits not available		25-35 years	Male	both swa and eng	hivtst	HST	HIV testing	diabetic drugs & hst	Other	Family member		Yes	unknown	No	friend/ family member who heard about/participated in the study	No		No	2	within last 12 months	To plan the future/ getting married/ take charge over one's health	Private hospital/ clinic (including NGO, CBO and faith-based facilities)	Easily accessible	2	Morning	Female staff	Before posters	ra										Strongly agree			Strongly agree
1	1	1	0	kits not available		>35 years	Male	both swa and eng	hivtst	HST	HIV testing	diabetic drugs	Self	Self		No		No	friend/ family member who heard about/participated in the study	No		Yes	1	within last 12 months	To understand illness or symptoms that I had	Private hospital/ clinic (including NGO, CBO and faith-based facilities)	Confidential/ private/ discreet	2	Afternoon	Female staff	Before posters	ra										Agree			Strongly agree			Everyone
1	1	1	1		1	18-24 years	Male	both swa and eng	hivtst	HST	HIV testing	hst	Self	Self		No		No	friend/ family member who heard about/participated in the study	No		Yes	1	within last 12 months	Encouraged by sex partner	Government hospital/ clinic	Easily accessible	2	Afternoon	Female staff	Before posters	ra	Over the counter	No			Neg	Yes	Friend	Easy		Strongly agree	when you know your HIV status early you can take medication and prolong your life	Strongly agree	Strongly agree	Agree	because phamacies are easily accesable	The youth	The youth
1	1	1	1		1	25-35 years	Female	both swa and eng	hivtst	Other HIV test	HIV testing		Other	Family member		No		Yes	media or internet	Yes	pregnancy	No	>=4	earlier than 12 months ago	Advice from doctor or health provider/ ANC invitation	VCT/ HTC center	Easily accessible	2	Morning	Female staff	Before posters	ra	Over the counter				Neg	Yes	Sex partner	Very easy		Strongly agree	anybody can be able to acces it	Strongly agree	Strongly agree	Disagree	most people dont go to the pharmacy, the kits should be dispensed in hospitals for free	Everyone	Everyone
1	0	0	0	in a hurry/ to come later		25-35 years	Male		mal	Other products	Other products		Self	Self					friend/ family member who heard about/participated in the study									2	Morning	Female staff	Before posters
1	0	0	0	in a hurry/ to come later		>35 years	Male		perform	Other products	Other products		Self	Self					friend/ family member who heard about/participated in the study									2	Morning	Female staff	Before posters
1	0	0	0	in a hurry/ to come later		25-35 years	Male		perform	Other products	Other products		Self	Self					friend/ family member who heard about/participated in the study									2	Morning	Female staff	Before posters
1	0	0	0	in a hurry/ to come later		25-35 years	Female		sti	Other products	Other products		Self	Self					friend/ family member who heard about/participated in the study									2	Afternoon	Female staff	Before posters
1	0	0	0	in a hurry/ to come later		25-35 years	Female		pgtst	Other products	Other products		Self	Self					friend/ family member who heard about/participated in the study									2	Afternoon	Female staff	Before posters
1	0	0	0	in a hurry/ to come later		>35 years	Male		condoms	Other products	Other products		Self	Self					friend/ family member who heard about/participated in the study									2	Afternoon	Female staff	Before posters
1	0	0	0	in a hurry/ to come later		25-35 years	Male		pgtst	Other products	Other products		Other	Family member					friend/ family member who heard about/participated in the study									2	Afternoon	Female staff	Before posters
[truncated: 9 more columns]
